1 **A new sequencing-based women's health assay combining self-sampling, HPV**  
2 **detection and genotyping, STI detection, and vaginal microbiome analysis**

3  
4 Elisabeth M. Bik<sup>1#</sup>, Sara W. Bird<sup>1#</sup>, Juan P. Bustamante<sup>1#</sup>, Luis E. Leon<sup>1#</sup>, Pamela A.  
5 Nieto<sup>1#</sup>, Kwasi Addae<sup>1</sup>, Víctor Alegría-Mera<sup>1</sup>, Cristian Bravo<sup>1</sup>, Denisse Bravo<sup>1</sup>, Juan P.  
6 Cardenas<sup>1</sup>, Adam Caughey<sup>1</sup>, Paulo C. Covarrubias<sup>1</sup>, José Pérez-Donoso<sup>1</sup>, Graham  
7 Gass<sup>1</sup>, Sarah L. Gupta<sup>1</sup>, Kira Harman<sup>1</sup>, Donna Marie B. Hongo<sup>1</sup>, Juan C. Jiménez<sup>1</sup>,  
8 Laurens Kraal<sup>1</sup>, Felipe Melis-Arcos<sup>1</sup>, Eduardo H. Morales<sup>1</sup>, Amanda Morton<sup>1</sup>, Camila F.  
9 Navas<sup>1</sup>, Harold Nuñez<sup>1</sup>, Eduardo Olivares<sup>1</sup>, Nicolás Órdenes-Aenishanslins<sup>1</sup>, Francisco  
10 J. Ossandon<sup>1</sup>, Richard Phan<sup>1</sup>, Raul Pino<sup>1</sup>, Katia Soto-Liebe<sup>1</sup>, Ignacio Varas<sup>1</sup>, Patricia  
11 Vera-Wolf<sup>1</sup>, Nathaniel A. Walton<sup>1</sup>, Daniel E. Almonacid<sup>1</sup>, Audrey D. Goddard<sup>1</sup>, Juan A.  
12 Ugalde<sup>1</sup>, Jessica Richman<sup>1</sup>, Zachary S. Apte<sup>1,2\*</sup>

13

14

15 <sup>1</sup> uBiome, San Francisco, CA

16 <sup>2</sup> University of California San Francisco, San Francisco, CA

17 #, Shared first authors

18 \*, Corresponding author; email: [zac@ubiome.com](mailto:zac@ubiome.com)

19

20

21

22

## 23 Abstract

24

25 The composition of the vaginal microbiome, including both the presence of  
26 pathogens involved in sexually transmitted infections (STI) as well as commensal  
27 microbiota, has been shown to have important associations for a woman's reproductive  
28 and general health. Currently, healthcare providers cannot offer comprehensive vaginal  
29 microbiome screening, but are limited to the detection of individual pathogens, such as  
30 high-risk human papillomavirus (hrHPV), the predominant cause of cervical cancer.  
31 There is no single test on the market that combines HPV, STI, and microbiome  
32 screening. Here, we describe a novel inclusive women's health assay that combines  
33 self-sampling with sequencing-based HPV detection and genotyping, vaginal  
34 microbiome analysis, and STI-associated pathogen detection. The assay includes  
35 genotyping and detection of 14 hrHPV types, 5 low-risk HPV types (lrHPV), as well as  
36 the relative abundance of 32 bacterial taxa of clinical importance, including  
37 *Lactobacillus*, *Sneathia*, *Gardnerella*, and 4 pathogens involved in STI, with high  
38 sensitivity, specificity, and reproducibility. For each of these taxa, healthy ranges were  
39 determined in a group of 50 self-reported healthy women. The hrHPV portion of the test  
40 was evaluated against the Digene High-Risk HPV HC2 DNA test with vaginal samples  
41 obtained from 185 women. Results were concordant for 181/185 of the samples (overall  
42 agreement of 97.83%, Cohen's kappa = 0.93), with sensitivity and specificity values of  
43 94.74% and 98.64%, respectively. Two discrepancies were caused by the Digene  
44 assay's known cross-reactivity with low-risk HPV types, while two additional samples  
45 were found to contain hrHPV not detected by Digene. This novel assay could be used to  
46 complement conventional cervical cancer screening, because its self-sampling format  
47 can expand access among women who would otherwise not participate, and because of  
48 its additional information about the composition of the vaginal microbiome and the  
49 presence of pathogens.

50

51

## 52 Introduction

53

54 A woman's vaginal health is critical for her general well-being and reproductive  
55 success, and is determined by the vaginal microbiome composition, the presence of  
56 pathogens associated with sexually transmitted infections (STI), and the presence of  
57 human papillomavirus (HPV) types that can cause genital warts or cervical cancer.  
58 Current clinical women's health assays focus on the detection of STI or that of HPV, but  
59 there is no single test that combines these targets with vaginal microbiome analysis or  
60 with self-sampling.

61 The human vaginal microbiome has a unique composition compared to other  
62 microbial communities in the human body. In most healthy women, the vaginal  
63 microbiome is characterized by a low bacterial diversity and a dominance of lactobacilli,  
64 with low abundance of other bacterial genera (Ravel *et al.* 2011; Younes *et al.* 2017).  
65 Several vaginal microbial community types have been described, most of which are  
66 dominated by a single *Lactobacillus* species. Lactic acid produced by lactobacilli lowers  
67 the vaginal pH, which is believed to create an environment unfavorable for the growth of  
68 pathogenic bacteria (O'Hanlon *et al.* 2013). Low numbers of vaginal lactobacilli have  
69 been associated with many health conditions, such as bacterial vaginosis (Ling *et al.*  
70 2010; Ravel *et al.* 2011; Ravel *et al.* 2013; Srinivasan *et al.* 2012), aerobic vaginitis  
71 (Donders *et al.* 2017), cervicitis (Gorgos *et al.* 2015), and STI (Petrova *et al.* 2015; Hill  
72 *et al.* 2016; Jensen 2017; Ziklo *et al.* 2016). The composition of a woman's vaginal  
73 microbiome thus plays an important role in women's health and reproductive success.  
74 Yet, the analysis of this microbial community is not part of regular health care for  
75 women. In the US, as in many other countries, most healthcare providers instead focus  
76 on the detection of high-risk human papillomavirus (hrHPV), the predominant cause for  
77 cervical cancer.

78 Cervical cancer is one of the major causes of cancer-related deaths in women,  
79 with an annual worldwide mortality of 250,000 (Bray *et al.* 2013; Jemal *et al.* 2011).  
80 hrHPV DNA can be detected in almost all (>99%) cervical cancer specimens, and HPV  
81 is therefore considered the predominant causative agent for cervical cancer (Bosch and  
82 Muñoz 2002; Walboomers *et al.* 1999). Although HPV infection is the most common STI

83 worldwide, not all HPV infections will lead to cancer. Firstly, certain HPV types have  
84 higher oncogenic risks than others. Of the over 170 different HPV genotypes known to  
85 date, twelve types have been classified as Group 1 human carcinogens; these include  
86 types 16, 18, 31, 33, 35, 39, 45, 51, 52, 56, 58, and 59 (Bouvard et al. 2009; IARC  
87 Working Group on the Evaluation of Carcinogenic Risks to Humans 2012). Together  
88 with other, closely related HPV types such as 66 and 68, which have been listed as  
89 probably or possibly carcinogenic, these are collectively called high risk HPV (hrHPV)  
90 types. hrHPV types 16 and 18 can be found in over 70% of cervical cancers (de  
91 Sanjose et al. 2010) and the presence of these types is associated with the highest  
92 chance of developing cancer within 10 years (Khan et al. 2005). However, other hrHPV  
93 genotypes have also been shown to cause cervical cancer, and especially among  
94 women of non-European descent (Vidal et al. 2014). In addition, many hrHPV infections  
95 are temporary and will be cleared within months of acquisition, without proceeding to  
96 pre-cancerous lesions (Rosa et al. 2008). Other HPV types, collectively called low-risk  
97 HPV (lrHPV), are not implicated in cervical cancer, but instead cause genital warts  
98 (Egawa and Doorbar 2017).

99 National cervical cancer screening programs are offered to women over 21 years  
100 old worldwide (Mendes et al. 2015). Most of these programs involve an invitation for a  
101 Pap smear, in which a woman's cervical cells are obtained by a physician for cytology  
102 (Tambouret 2013), but additional molecular HPV testing is increasingly offered by health  
103 care providers as well (Tota et al. 2017). Studies suggested that clinical tests based on  
104 detection of HPV DNA exhibit higher sensitivity for detection of cervical intraepithelial  
105 neoplasia, in comparison with Pap testing (e.g. Mayrand et al. 2007). In the United  
106 States, most healthcare providers follow the American College of Obstetricians and  
107 Gynecologists (ACOG) guidelines (Committee on Practice Bulletins—Gynecology 2016)  
108 or the U.S. Preventive Services Task Force (USPSTF) guidelines for women (US  
109 Preventive Services Task Force 2016) to come in for a Pap smear, often with HPV  
110 testing, every three to five years, depending on age and risk factors.

111 Several commercial kits have FDA pre-market approval for the molecular  
112 detection of HPV (Gradissimo and Burk 2017). In a 2014 meta-analysis of 36 studies,  
113 the Qiagen Digene<sup>®</sup> Hybrid Capture<sup>®</sup> 2 (HC2) assay was the most widely used (Arbyn et

114 al. 2014). In the HC2 assay (de Roda Husman et al. 1995), vaginal specimens are  
115 denatured with sodium hydroxide, denatured viral DNA is hybridized with specific RNA  
116 probes, and RNA:DNA hybrids are subsequently detected with antibodies (Lörincz  
117 1996). The HC2 test detects 13 hrHPV types, but does not report which specific type is  
118 present. Other HPV detection assays involve the amplification of viral DNA by  
119 Polymerase Chain Reaction (PCR). The most widely used primer pairs for HPV PCR  
120 detection are the GP5+/6+ primers (de Roda Husman et al. 1995) and the degenerate  
121 MY09/11 primers (Manos et al. 1989) or the PGMY09/11 primer pool (Gravitt et al.  
122 2000), which are all based on conserved regions in the viral L1 open reading frame. The  
123 COBAS<sup>®</sup> 4800 assay detects 14 hrHPV types using multiplex real-time PCR with  
124 specific probes; it reports the presence of HPV16, HPV18, or one of 12 remaining  
125 hrHPV types (Heideman et al. 2011).

126 Despite the offering of cervical cancer screening services, only 81% of women in  
127 the US participate in cervical cancer screening programs (National Center for Health  
128 Statistics. 2016; Watson et al. 2017). About one in five US women aged 21–65, a group  
129 of 14 million women, have not been screened in the past 3 years (Watson et al. 2017).  
130 Screening participation is particularly low among certain populations such as American  
131 Indians, Asians, Native Hawaiians, and recent immigrants, as well as women who live  
132 below poverty level or who have experienced partner violence (Musselwhite et al. 2016;  
133 National Center for Health Statistics. 2016; Levinson et al. 2016; Watson et al. 2017).  
134 Failure to respond to cervical cancer screening invitations and reminders can be caused  
135 by a combination of different factors. The most important reasons for attendance failure  
136 are lack of time for a visit to a clinic, embarrassment to undergo a pelvic exam, and  
137 memories of discomfort or pain at previous clinical visits (Dzuba et al. 2002; Sultana et  
138 al. 2015).

139 In the US, self-screening for HPV testing is not yet recommended as part of the  
140 standard of care. However, a number of countries have already switched to or are  
141 considering to offer self-sampling and HPV testing as a way to increase attendance for  
142 cervical cancer screening. In 2016, the Netherlands was the first country to start a new  
143 screening program that allows women to self-collect samples for HPV testing  
144 (Rozemeijer et al. 2015). Clinical trials in many other countries are ongoing, including

145 Australia (Sultana et al. 2016), Denmark (Tranberg et al. 2016), Finland (Virtanen et al.  
146 2015), Italy (Giorgi Rossi et al. 2015), Norway (Enerly et al. 2016), Switzerland (Viviano  
147 et al. 2017), and the UK (Lim et al. 2017). Offering women the opportunity to self-collect  
148 vaginal specimens poses fewer barriers for women to be screened, leading to increased  
149 participation rates (Verdoodt et al. 2015). Thus, encouraging women to self-collect  
150 vaginal samples for hrHPV screening may have an impact on rates of detection of  
151 cervical cancer (Wong et al. 2016).

152 The vaginal microbiome is an emerging area of research in understanding the  
153 role of HPV infections and reducing the risk of cervical cancer (Mitra et al. 2016).  
154 Several studies suggest a relationship between the composition of the vaginal  
155 microbiota and the acquisition and persistence of HPV infection. For example, vaginal  
156 microbial diversity is increased during an HPV infection, with decreased levels of  
157 *Lactobacillus* species and an increased presence of other microbial members such as  
158 *Sneathia* species or *Gardnerella vaginalis* (Gao et al. 2013; Lee et al. 2013; Brotman et  
159 al. 2014; Reimers et al. 2016; Shannon et al. 2017). In addition, certain microbiota  
160 compositions are associated with increased clearance of detectable HPV (Brotman et  
161 al. 2014).

162 In this study, we tested the feasibility of a novel assay, that combines the  
163 detection and identification of HPV DNA, STI-associated pathogens, and microbiome  
164 analysis on samples obtained through self-sampling. We validated the performance of  
165 marker gene amplification and sequencing to detect the presence and relative  
166 abundance of 32 clinically important bacterial targets with high precision and accuracy.  
167 In addition to detecting *Lactobacillus*, *Sneathia*, and *Gardnerella* spp., this test detects  
168 STI-associated pathogens including *Chlamydia trachomatis*, *Mycoplasma genitalium*,  
169 *Neisseria gonorrhoeae*, and *Treponema pallidum*, which cause chlamydia, genital tract  
170 infections, gonorrhea, and syphilis, respectively. The performance of a novel  
171 amplification and sequencing-based strategy for HPV detection and type-specific  
172 identification was compared to that of the most widely used test for HPV detection in  
173 cervicovaginal specimens, the Digene HC2 test. This assay is intended to complement,  
174 rather than replace, current healthcare guidelines for in-clinic cervical cancer screening.

175

## 176 Materials and methods

### 177 Study participants and sample collection

178 The specimens used in this study consisted of vaginal samples from women who  
179 had signed an informed consent to have their samples used for research. This study  
180 was approved under a Human Subjects Protocol provided by an IRB (E&I Review  
181 Services, IRB Study #13044, 05/10/2013). All participants were 18 years or older. A  
182 vaginal self-collection kit was sent to each participant's home address, consisting of a  
183 sterile swab, a tube with sterile water, a tube with zirconia beads in a proprietary lysis  
184 and stabilization buffer that preserves the DNA for transport at ambient temperatures,  
185 and sampling instructions ([Supplementary Figure 1](#), included in the Supplementary  
186 Materials). Participants were instructed to wet the swab with the sterile water, insert the  
187 swab into the vagina as far as is comfortable, make circular movements around the  
188 swab's axis for 1 minute (min), and then stir the swab for 1 min into the tube with lysis  
189 buffer and beads. After shaking the tube for 1 min to homogenize, the tube was then  
190 shipped by the participants to the laboratory by regular mail.

191 For the determination of the healthy ranges of the 32 bacterial targets, a set of 50  
192 vaginal specimens, each from a different woman (average age  $48.4 \pm 15.6$  years), was  
193 selected. Inclusion criteria were the following: completion of the voluntary health survey  
194 that every woman was invited to participate in, and no report of the following conditions:  
195 bacterial vaginosis, cervical cancer, genital herpes or warts, urinary tract infection, or  
196 infection with HPV, *C. trachomatis*, *T. pallidum*, or yeast. In addition, all of these women  
197 reported no antibiotic usage in the six months before sampling.

198 A different set of specimens from 88 women was used to compare the  
199 performance of sampling with the Digene collection device (Qiagen, Gaithersburg, MD,  
200 USA) and DNA extracted from samples collected with swabs. For this subset, women  
201 were asked to self-sample 2 vaginal specimens within 15 minutes. The first specimen  
202 was collected by using the Digene collection device, which consists of a cervical brush  
203 and a Digene transport tube with Specimen Transport Medium (STM). The second  
204 specimen was collected using a pre-wetted swab and resuspended in a collection tube  
205 with lysis buffer and beads, as described above, and used for DNA extraction.

206 A third set of vaginal specimens from 185 women was selected to compare the

207 performance of the Digene HC2 HPV assay versus that of the amplification and  
208 sequence-based HPV type identification described in this study.

209 For use in some experiments described below, homogenized “vaginal pools”  
210 were created by combining 96 vaginal samples derived from 11 or 16 individuals who  
211 sampled themselves multiple times.

212

### 213 **Positive STI control samples**

214 Ten de-identified cervicovaginal swab specimens of known STI pathogen status  
215 were obtained through a commercial source (iSpecimen, Lexington, MA). Five of these  
216 samples were reported to be positive for *C. trachomatis* and negative for *N.*  
217 *gonorrhoeae*, while a second set of five samples were negative for *C. trachomatis* and  
218 positive for *N. gonorrhoeae*. Each sample was tested in five replicates for DNA  
219 extraction, 16S rRNA gene amplification, and target identification as described below.

220

### 221 ***In silico* 16S rRNA gene target performance metrics**

222 The assay includes 32 bacterial targets with clinical relevance for women’s  
223 reproductive tract health, which were identified through an exhaustive literature search  
224 (Figure 1). These targets were chosen based on a review of the clinical and scientific  
225 literature related to vaginal health. The most relevant associations between health  
226 conditions and the vaginal microbiota were narrowed down by choosing associations  
227 with high statistical significance that were found in humans subjects, not in laboratory  
228 animals or bioreactors, but performed on case/control, cohorts or randomized studied  
229 population. These include bacterial vaginosis (Ling 2010, Ravel 2011, Ravel 2014,  
230 Srinivasan 2012), aerobic vaginitis (Donders 2017), pelvic inflammatory disease  
231 (Brunham 2015), and sexually transmitted infections (Hill 2016; Jensen 2017; Ziklo  
232 2016). A complete list of these associations and references are provided in  
233 **Supplementary Table 1**. For each bacterial taxon intended to be included in this assay,  
234 using a process similar to that described in Almonacid et al. (2017), we determined *in*  
235 *silico* performance metrics for identification of each taxa (sensitivity, specificity, positive  
236 and negative predictive value). Briefly, sequences assigned to each taxa in the Silva  
237 database (Version 123) (Quast, 2013) were considered to be real positives for that taxa.



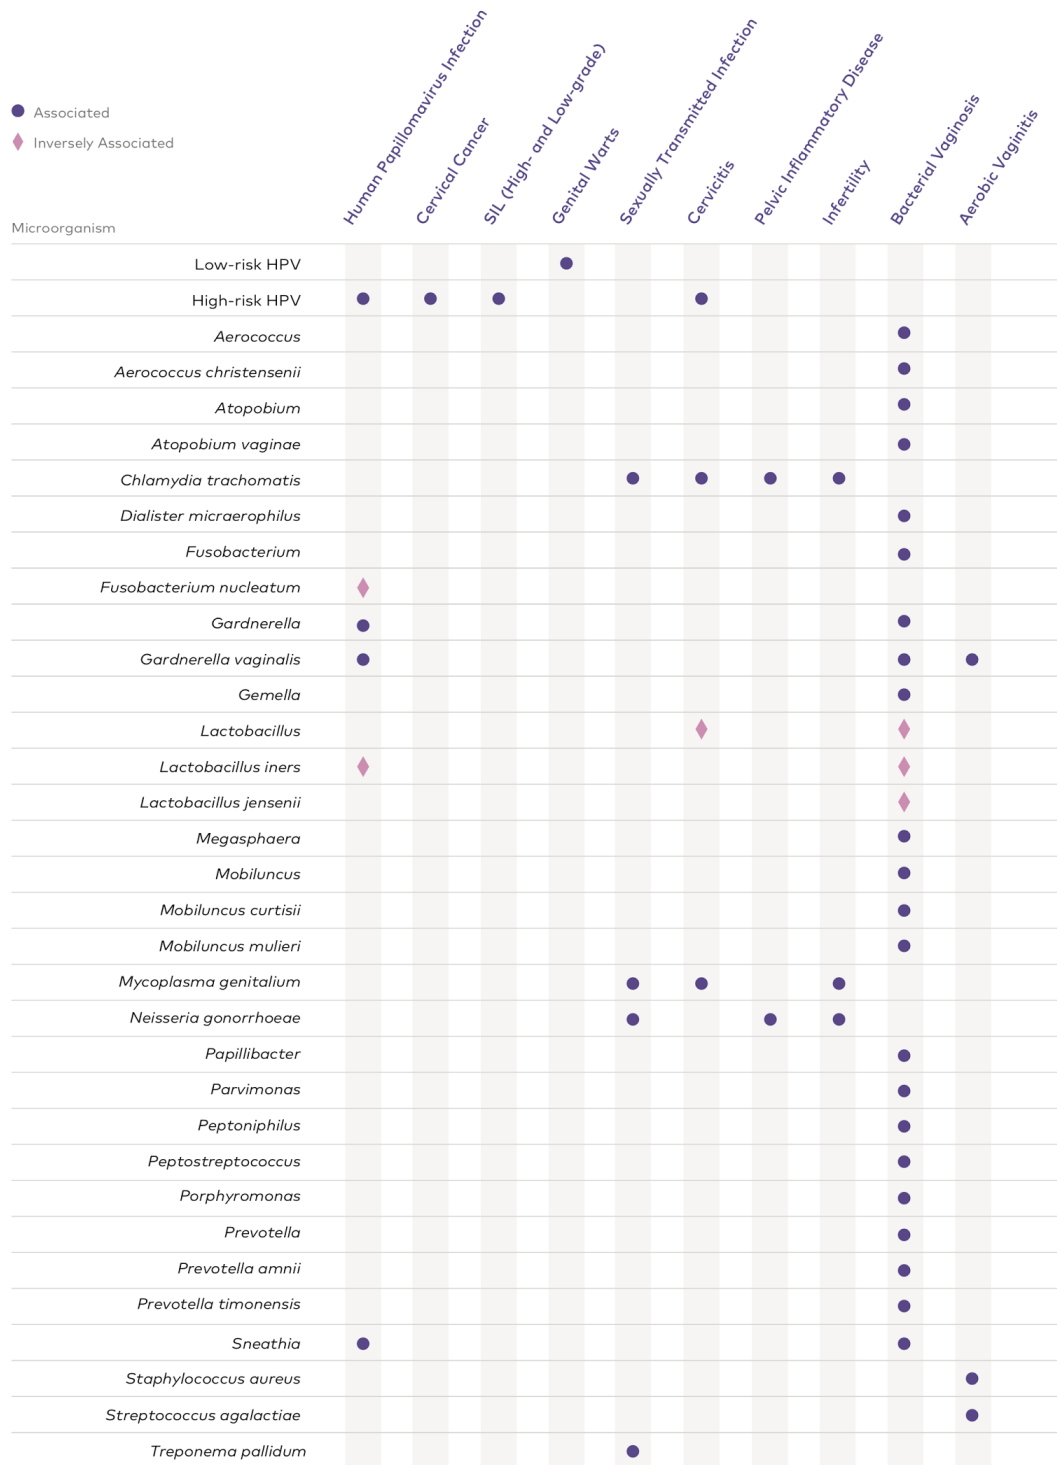

238

239

240 **Figure 1. The 32 bacterial targets and HPV targets covered by the assay and their associated**

241 **health conditions.** See Supplementary Table 1 in the Supplementary Materials for more detailed

242 information about e.g. the HPV genotypes included and a list of references.

243 Then, assuming amplification with up to two mismatches with the primers used,  
244 we identified for each taxa the sequences that would produce an amplicon, and  
245 evaluated whether that amplicon is unique to the taxon of interest (ti) or also shared by  
246 sequences from different taxa (dt). The number of true positives (TP), true negatives  
247 (TN), false positives (FP) and false negatives (FN) was computed for different tolerance  
248 ratios for the quotient dt/ti, and subsequently *in silico* performance metrics were  
249 assessed. Of the 73 bacterial targets initially selected, the 32 targets selected for the  
250 assay had all four *in silico* performance metrics above 90% ([Supplementary Figure 2](#)).

251

### 252 ***In silico* HPV target performance metrics**

253 In addition to the 32 bacterial targets, hrHPV and lrHPV targets were selected for  
254 inclusion in the assay, based on their association with cervical cancer lesions or genital  
255 warts ([Figure 1, Supplementary Table 1](#)). HPV reference genomes were downloaded in  
256 August 2017 from the PaVE database, which is a repository of curated and annotated  
257 HPV genomes (Van Doorslaer et al. 2013, Van Doorslaer et al. 2017). Only revised and  
258 recognized sequences (180 HPV genomes) were used for an *in silico* PCR amplification  
259 using a set of 15 forward and 6 reverse primers (described below) targeting the L1 gene  
260 and allowing up to 4 mismatches between primers and target sequences. Under these  
261 conditions, the L1 genes from 118 HPV genomes could be amplified *in silico*. Of these,  
262 19 HPV genomes, including 14 hrHPV types (i.e., types 16, 18, 31, 33, 35, 39, 45, 51,  
263 52, 53, 56, 58, 59, 66, 68) and 5 lrHPV types (6, 11, 42, 43, 44) were selected based on  
264 their association with health conditions according to literature ([Supplementary Table 1](#)).  
265 In order to evaluate the performance metrics for identification of the HPV targets,  
266 sequences of the L1 segment of HPV genomes from the NCBI database were used.  
267 The search was filtered to sequences with length in the range 1,500-10,000 bp and with  
268 correct assignment of the type of the HPV (4177 sequences). These sequences were  
269 amplified *in silico* using the primers described below. Following these steps, we  
270 generated 161,398 amplicons. These sequences were mapped using Vsearch (Rognes  
271 2016) at 95% of identity against an HPV amplicon reference database consisting of the  
272 amplicons produced by the reference genomes in PaVe for the 19 HPV types included  
273 in our assay. The performance metrics were calculated in a manner analogous to how

274 they were calculated for the 16S rRNA gene targets. Briefly, the correct assignment of  
275 an NCBI amplicon against the reference was counted as a true positive and an incorrect  
276 assignment was considered as a false negative. Also, we considered as a false  
277 negatives the genomes from NCBI that our primers could not amplify. According to this,  
278 the 19 HPV types obtained values for sensitivity, specificity, positive predictive value  
279 (PPV) and negative predictive values (NPV) above 90% ([Supplementary Table 2](#)).

280

### 281 ***In vitro* validation of bacterial targets**

282 To test our ability to identify members of each of the 32 bacterial targets,  
283 synthetic DNAs (sDNAs or gBlocks, Integrated DNA Technologies, Inc., Coralville, IA),  
284 were designed encompassing the V4 region of the 16S rRNA gene including primer  
285 regions, based on a Silva representative sequence, plus 75 additional bases to both the  
286 5' and 3' side, with one sDNA per target ([Supplementary Table 3](#)). The Silva  
287 representative sequence per taxa was chosen by performing an all-against-all sequence  
288 comparison of all sequences in a taxa, and identifying as representative the sequence  
289 that shared the highest similarity with the largest number of sequences in the set.

290 To validate that each target could be detected in a vaginal swab specimen, 3 ng  
291 of each sDNA was spiked into 500  $\mu$ l aliquots of a vaginal pool, created by combining  
292 96 vaginal specimens of women included in this study, and DNA was extracted from  
293 each spiked vaginal pool (see below). Each spike-in experiment was performed in  
294 triplicate. Subsequently, bacterial targets were detected by amplification using PCR  
295 targeting the 16S rRNA gene, sequencing, and a bioinformatics pipeline described  
296 below. Each target included in the final panel was detected above limit of detection  
297 (LOD) (see below) in each of the triplicate spiked-in amplification reactions performed  
298 on the extracted DNA from the vaginal pool (not shown).

299 In addition, the LOD of each target in a complex background of other targets was  
300 determined according to published guidelines (Clinical and Laboratory Standards  
301 Institute 2004). First, we calculated a limit of blank (LOB), which was calculated using a  
302 set of 77 blank wells of a 96-well PCR plate where wells of the first row and first column  
303 of the plate each contained 200 pg/ $\mu$ l of synthetic 16S rRNA gene DNA from different  
304 targets. The LOB was set as the average number of reads in these blank wells (18.57

305 reads) plus 1.65 standard deviations (29.70 reads), thus at 48.27 reads. To calculate  
306 the LOD of the bacterial target, pools of bacterial sDNAs were mixed in different ratios.  
307 To create these mixes, each bacterial sDNA was randomly assigned to one of two  
308 pools, A and B, that each contained sDNAs in equimolar amount. Each pool was serially  
309 diluted in PCR grade water. Pool A dilutions were mixed 1:1 with undiluted Pool B and  
310 vice versa. All pool A/B combinations were used in triplicate for DNA extraction,  
311 amplification, and sequencing as described below. For each target, the LOD was  
312 defined as the lowest concentration of sDNA where at least two of the three replicates  
313 contained at least 2 reads for that target in a sample with 10,000 reads or more. Using  
314 this LOD, we calculated a lower threshold for detection for each taxa at its LOD as the  
315 LOB (48.27) plus the standard deviation of the taxa at LOD \* 1.65. This threshold is  
316 used to correctly assign a taxa as identified in a sample at or above its LOD.

317 For targets that had both a species and a genus level sDNA present in the mixed  
318 pools A and B, a bioinformatic correction was applied. The total reads for a genus-level  
319 target for which a species within that genus was also present in the mixed pools, was  
320 defined as the total measured reads for the genus and subtracting all those reads  
321 corresponding to species-level targets belonging to that genus in the same pool mix,  
322 i.e., only reads that match to a genus and not to a species level were finally assigned to  
323 the genus.

324

### 325 ***In vitro* validation of HPV targets**

326 To test the ability of our assay to detect and genotype HPV targets, fragments of  
327 the L1 gene of approximately 600bp long were ordered for each of the representative  
328 sequences of 19 HPV types in the PaVE database as sDNAs (gBlocks, Integrated DNA  
329 Technologies, Inc.). To represent hrHPV type 68, two sDNAs were ordered, 68a and  
330 68b. The sequences of the 20 gBlocks representing 19 HPV types (14 hrHPV and 5  
331 IrHPV) are listed in [Supplementary Table 4](#). To validate that each target could be  
332 detected in a vaginal swab specimen, 3 ng of each HPV sDNA was spiked into 500  $\mu$ l  
333 aliquots of a vaginal pool created by combining 96 vaginal specimens of women  
334 included in this study, and DNA was extracted from each spiked vaginal pool (see  
335 below). Subsequently, the spiked HPV targets were detected by amplification using the

336 PCR targeting the L1 gene and bioinformatics pipeline described below. Each spike-in  
337 experiment was performed in triplicate. Each HPV target was detected above the LOD  
338 (see below) in each of the triplicate spiked-in amplification reactions performed on the  
339 extracted DNA from the vaginal pool (not shown). Each target had a ratio > 0.1 for the  
340 number of HPV-assigned reads divided by the total number of normalized reads  
341 assigned to an internal spike-in control (see below).

342 To determine the LOD of HPV targets, 10-fold serial dilutions of the sDNAs  
343 representing HPV targets were made in nuclease-free water, ranging from  $10^5$  to  $10^2$   
344 molecules per  $\mu\text{l}$ . Dilutions of one target were inversely combined with dilutions of  
345 another target, forming different pairs of HPV sDNAs. Each dilution pair was used  
346 directly as template for PCR in triplicate as described below.

347

#### 348 **DNA extraction and amplification targeting 16S rRNA and HPV L1 genes**

349 DNA was extracted from vaginal specimens, pools thereof, or sDNA dilutions in  
350 tubes containing lysis/stabilization buffer as described previously (Almonacid et al.  
351 2017). For 16S rRNA gene amplification, extracted DNA was used as the input of a one-  
352 step PCR protocol to amplify the V4 variable region of the 16S rRNA gene. This PCR  
353 contained universal primers 515F and 806R (Almonacid et al. 2017; Caporaso et al.  
354 2011), both with sample-specific indices and Illumina tags. PCR was performed as  
355 described before (Almonacid et al 2017). Following amplification, DNA was pooled by  
356 taking the same volume from each reaction.

357 For HPV amplification, extracted DNA was used as the input of a PCR protocol to  
358 amplify the HPV L1 gene. To each sample, sDNA with a randomized HPV type 16  
359 sequence was added as an internal positive control. The first PCR mix contained a pool  
360 of previously described HPV specific primers (Gravitt et al. 2000; Estrade and Sahli  
361 2014), and two new primers, HPV\_RSMY09-LvJJ\_Forward: 5'  
362 CGTCCTAAAGGGAATTGATC, and HPV\_PGMY11-CvJJ\_Reverse: 5'  
363 CACAAGGCCATAATAATGG. All these primers contained sequencing adaptor regions.  
364 The PCR products from the first amplification round were used as input for a second  
365 PCR containing sample-specific forward and reverse indices and Illumina tags. PCR  
366 products from this second step were pooled for sequencing.

367 The 16S rRNA gene and HPV PCR consolidated library pools were separately  
368 quantified by qPCR using the KAPA Library Quant Kit (Bio-Rad iCycler qPCR Mix)  
369 following the manufacturer's instructions using a BioRad MyiQ iCycler. Sequencing was  
370 performed in a paired-end modality on the Illumina NextSeq 500 platform rendering 2 x  
371 150 bp pair-end sequences.

372

### 373 **Sequence analysis and taxonomic annotation for bacterial targets**

374 After sequencing, demultiplexing of reads according to sample-specific barcodes  
375 was performed using Illumina's BCL2FASTQ algorithm. Reads were filtered using an  
376 average Q-score > 30. Forward and reverse 16S rRNA gene reads were appended  
377 together after removal of primers and any leading bases, and clustered using version  
378 2.1.5 of the Swarm algorithm (Mahe 2014) using a distance of one nucleotide and the  
379 "fastidious" and "usearch-abundance" flags. The most abundant sequence per cluster  
380 was considered the real biological sequence and was assigned the count of all reads in  
381 the cluster. The representative reads from all clusters were subjected to chimera  
382 removal using the VSEARCH algorithm (Rognes 2016). Reads passing all above filters  
383 (filtered reads) were aligned using 100% identity over 100% of the length against the 32  
384 target 16S rRNA gene sequences described above ([Supplementary Table 4](#)). The  
385 relative abundance of each taxon was determined by dividing the count linked to that  
386 taxa by the total number of filtered reads.

387

### 388 **Sequence analysis and taxonomic annotation for HPV targets**

389 Raw sequencing reads were demultiplexed using BCL2FASTQ. Primers were  
390 removed using cutadapt (Martin 2011). Trimmomatic (Bolger 2014) was used to remove  
391 reads with a length less than 125 bp, and a mean quality score below 30. After that,  
392 forward and reverse paired reads were joined using custom in-house scripts and  
393 converted to a fasta file. Identical sequences were merged and written to a file in fasta  
394 format and sorted by decreasing abundance using --derep\_fulllength option in  
395 VSEARCH (Rognes 2016). Target sequences in the fasta files were compared to the  
396 fasta-formatted query database sequences (19 HPV target sequences) using the global  
397 pairwise alignment option with VSEARCH, using 95 percent sequence identity, to obtain

398 the counts for each HPV type within a different sample.

399 The HPV portion of the assay was considered positive if the number of sequence  
400 reads assigned to the specific HPV types was above the threshold at the limit of  
401 detection, and greater than a previously defined cutoff. To set this cutoff, two  
402 normalization steps were employed. First, according to *in silico* PCR amplification, a  
403 different number of combinations of primers amplify different HPV targets (e.g. HPV16  
404 is amplified using 66 different combinations, while HPV43 is amplified with just 10  
405 combinations), reflecting the sequence variability within the primer binding site among  
406 HPVs. This also means that the spiked-in internal control and the target HPV have  
407 different amplification efficiencies. To avoid this bias, the internal control (which has the  
408 primer sites for HPV16) is normalized for the amplification factor (number of primer  
409 combinations that generate an amplicon) of each HPV type. The number of HPV-  
410 assigned reads was divided by the total number of normalized reads assigned to the  
411 spike, and a sample was considered HPV-positive if that ratio was above 0.1, which  
412 was obtained from the concordance study, and corresponds to approximately 500 target  
413 molecules.

414

#### 415 **Intra- and inter-run precision**

416 Intra-run technical repeatability was assessed by including nine replicates of the  
417 same vaginal pool (consisting of 96 vaginal samples derived from 11 individuals) into  
418 the same DNA extraction, 16S rRNA gene amplification, and sequencing run. This  
419 experiment was then repeated in a second sequencing run to yield another set of nine  
420 replicate samples analyzed within the same run. In addition, inter-run technical  
421 reproducibility was performed by processing three replicates of a set of 18 vaginal  
422 samples on three different days by three different operators. Samples included in the  
423 analysis were those that had at least 10,000 reads and where at least two of the three  
424 replicates were present (11 sets).

425 Comparison of the results, both intra- and inter-run, were done using the raw  
426 counts of the 32 bacterial species- and genus-level targets. Data was processed using  
427 the R-package Phyloseq (McMurdie and Holmes 2013), visualized using Principal

428 Coordinates Analysis (PCoA), based on a distance matrix calculated using the Bray-  
429 Curtis method.

430

### 431 **Digene HC2 hrHPV test on Digene tubes or on extracted DNA**

432 The Digene HC2 High-Risk HPV detection assay (Qiagen) was used as a  
433 reference to validate the hrHPV portion of the assay. The High-Risk HPV Probe in the  
434 Digene HC2 HPV test detects hrHPV types 16, 18, 31, 33, 35, 39, 45, 51, 52, 56, 58,  
435 59, and 68, while the women's health test described here detects all these types plus  
436 HPV66. The Digene HC2 assay is intended to be used directly on vaginal samples  
437 collected in the Digene STM transport tube. In order to validate the use of the Digene kit  
438 on extracted vaginal DNA, we compared the performance of the Digene HC2 assay on  
439 a set of 88 self-obtained, paired vaginal samples, i.e. a Digene brush resuspended in  
440 STM, as well as DNA extracted from a vaginal swab resuspended in lysis and  
441 stabilization buffer. For the specimens collected in STM, 500 µl of specimen sample  
442 was mixed with 250 µl of Denaturing Reagent (provided in the Digene HC2 kit), shaken  
443 on a Hybrid Capture System Multi-Specimen Tube Vortexer (Digene) for 30 seconds,  
444 and incubated in a waterbath at 65°C for 45 min, as per the manufacturer's instructions.  
445 Alternatively, for specimens collected with the women's health assay kit, 50 µl of  
446 extracted DNA was mixed with 25 µl of denaturing reagent and incubated at 65°C for 45  
447 min in the Microplate Heater I (Digene). For both sample types, denatured samples  
448 were then hybridized to the High-Risk HPV RNA probe set in the Microplate Heater I at  
449 65°C for 60 min, and DNA:RNA hybrid molecules were detected using monoclonal  
450 antibodies and chemiluminescence measurement on a DML3000 machine, according to  
451 the manufacturer's instructions (Digene® HC2 HPV DNA Test Instructions For Use,  
452 Qiagen). Negative and positive controls and calibrators included in the kit were  
453 processed within each 96-well assay, and used for assay validation and cutoff, as per  
454 instructions. A specimen was considered positive if its chemiluminescence  
455 measurement (Relative Light Units, RLU) was higher than or equal to that of the assay's  
456 Positive Calibrator cutoff (RLU ratio of 1 or more), as specified in the Digene HC2 assay  
457 instructions.

458 Sensitivity, specificity, and accuracy of the hrHPV portion of the women's health



459 assay were evaluated using the Digene HC2 hrHPV assay as the gold standard and  
460 extracted DNA from 185 vaginal swabs as the input for both tests. The assay was  
461 considered to be positive for hrHPV if the number of reads assigned to hrHPV types  
462 divided by the normalized number of reads assigned to a spiked-in control (see above)  
463 was greater than 0.1. For this comparison, sequences assigned to hrHPV type 66 were  
464 not considered, because this type is not detected in the Digene assay. Agreement  
465 between the two methods was evaluated using Cohen's kappa (Cohen 1960), where  
466 the level of agreement is defined by the range: 0-0.2, poor; 0.21-0.40, fair; 0.41-0.6,  
467 moderate; 0.61-0.8, good; 0.81-1.00, very good.

468

## 469 Results

470

### 471 Limit of detection of bacterial and HPV targets

472 The test is based on a list of 32 bacterial 16S rRNA gene targets and 19 HPV  
473 types that were identified through an exhaustive literature search to play important roles  
474 in health and disease of women's reproductive tracts (Figure 1, Supplementary Table  
475 1). For each bacterial target, the LOD was determined by combining different dilutions  
476 of pools of sDNAs, followed by DNA extraction, amplification of the V4 region of the 16S  
477 rRNA gene using broad range primers, and sequencing (Figure 2). The LOB was set as  
478 the average number of reads in 77 blank wells (18.57 reads) plus 1.65 standard  
479 deviations (29.70 reads). Using this value, we calculated the threshold of identification  
480 for each taxon as the LOB + 1.65 standard deviations (48.27) plus the standard  
481 deviation of the taxon at LOD \* 1.65 (Supplementary Table 5). For example, the LOD for  
482 *Atopobium vaginae* was identified at the 1:100 dilution, and its corresponding threshold  
483 was set at 49 reads. For the other 31 taxa targeted by the assay, the threshold related  
484 to LODs was in the range 49.0 to 65.2 reads (Supplementary Table 5).

485 To determine the LOD for the HPV targets, different dilutions of pools of sDNAs  
486 were mixed as done for the bacterial targets. The molecules were then amplified,  
487 sequenced, and analyzed by the HPV bioinformatics pipeline. For all HPV targets  
488 analyzed, the threshold related to LODs was in the range 40.8 to 224.8 reads (Figure 3,  
489 Supplementary Table 6).

490

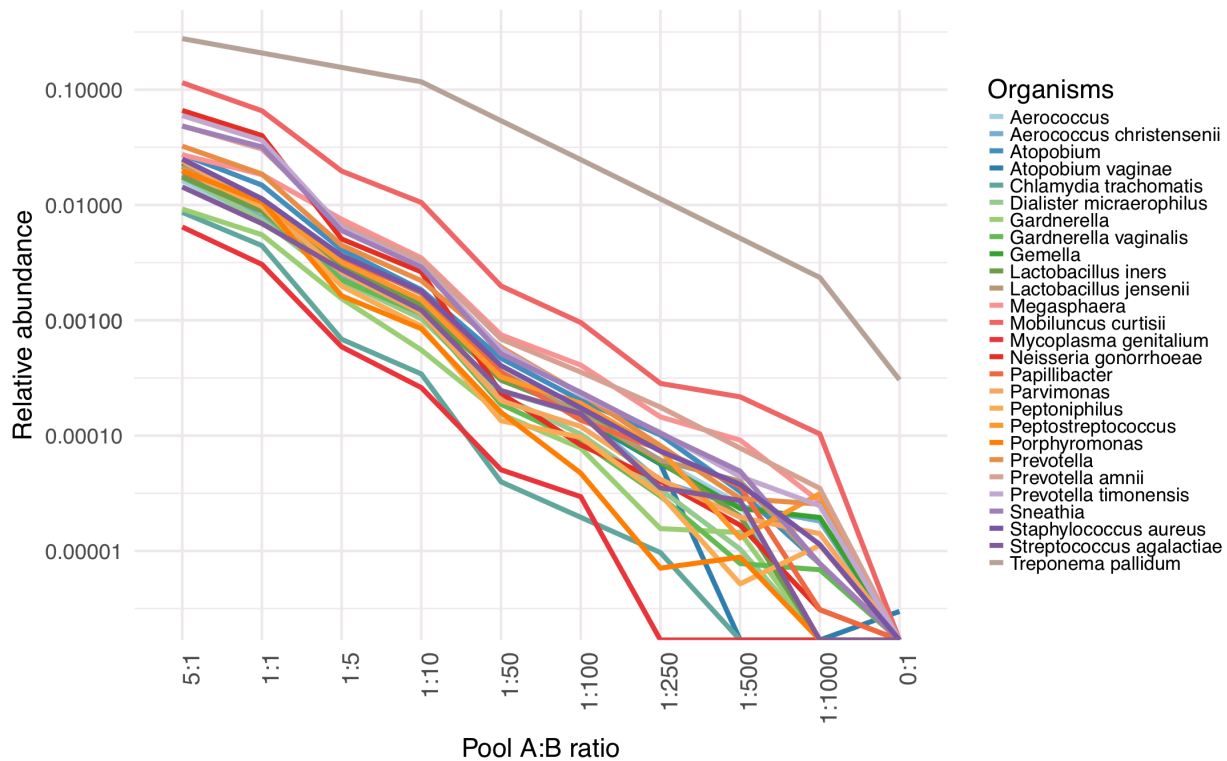

491

492

493

494 **Figure 2. Limit of detection of sDNAs representing bacterial 16S rRNA gene sequences in a**

495 **complex background of other sDNAs.** Dilutions of two pools of sDNAs were mixed in different

496 amounts, and bacterial targets were amplified and sequenced. For each dilution and target, the relative

497 abundance in samples with 10,000 reads or more are shown. Unlike all other targets, which were mixed

498 in pools consisting of 30 targets, the *T. pallidum* sDNA was tested in pools containing only 2 targets;

499 hence its relative abundance in the mixed pools was much higher than that of the other targets,

500 explaining why the *T. pallidum* curve is shifted to the right. LOD read thresholds are provided in

501 Supplementary Table 5.

502

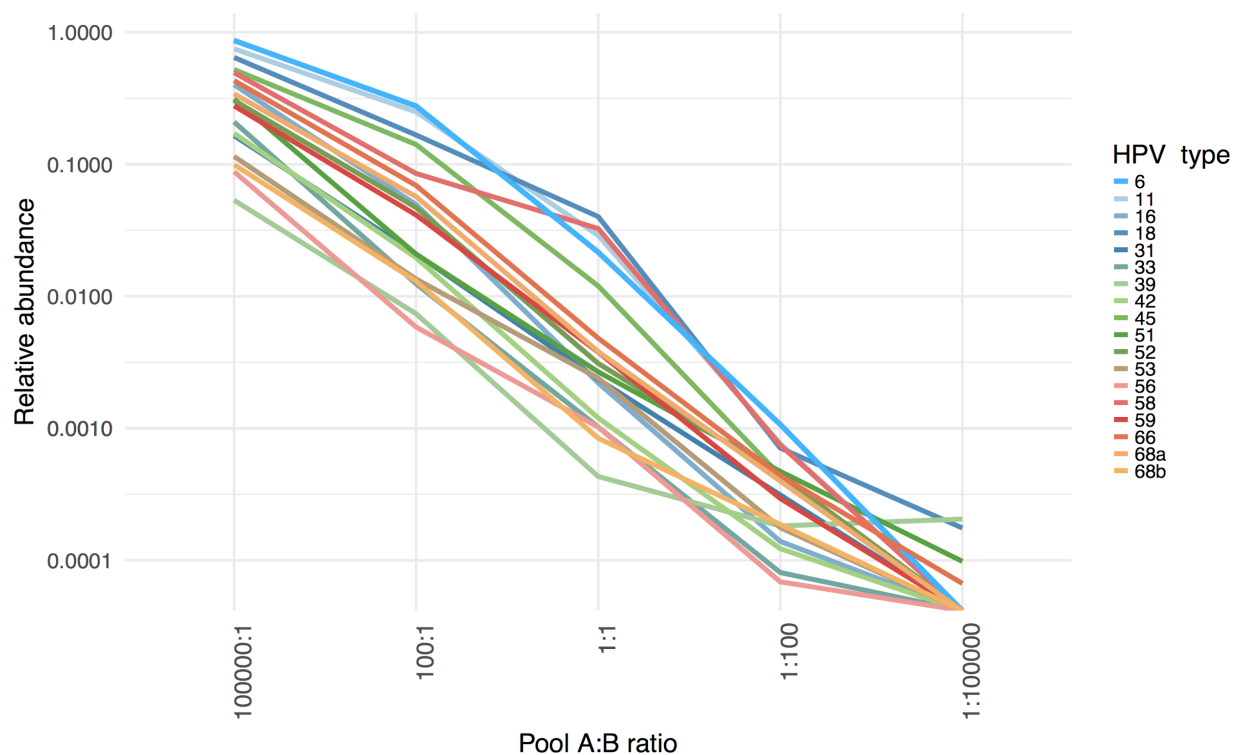

503

504

505 **Figure 3. Limit of detection of HPV types.** Dilutions of two pools of sDNAs representing HPV types  
506 were mixed in different amounts, and HPV types were amplified and sequenced. Two different sDNAs  
507 were used to represent hrHPV type 68. For each dilution and HPV type, the relative abundance in  
508 samples with 10,000 reads or more are shown. The LOD read thresholds for each HPV target are  
509 provided in Supplementary Table S7.

510

### 511 **Intra- and inter-run variability**

512 Intra-run technical variability was evaluated in a combined set of 18 replicates of  
513 the same vaginal pool, each of which yielded 10,000 reads or more. Ordination plots of  
514 both genus and species level bacterial communities (Figure 4) showed a tight clustering  
515 of intra-run technical replicates, indicating that within a single sequencing run, results  
516 generated by the laboratory process and the bioinformatics analysis were consistent.

517

518

519

520

521

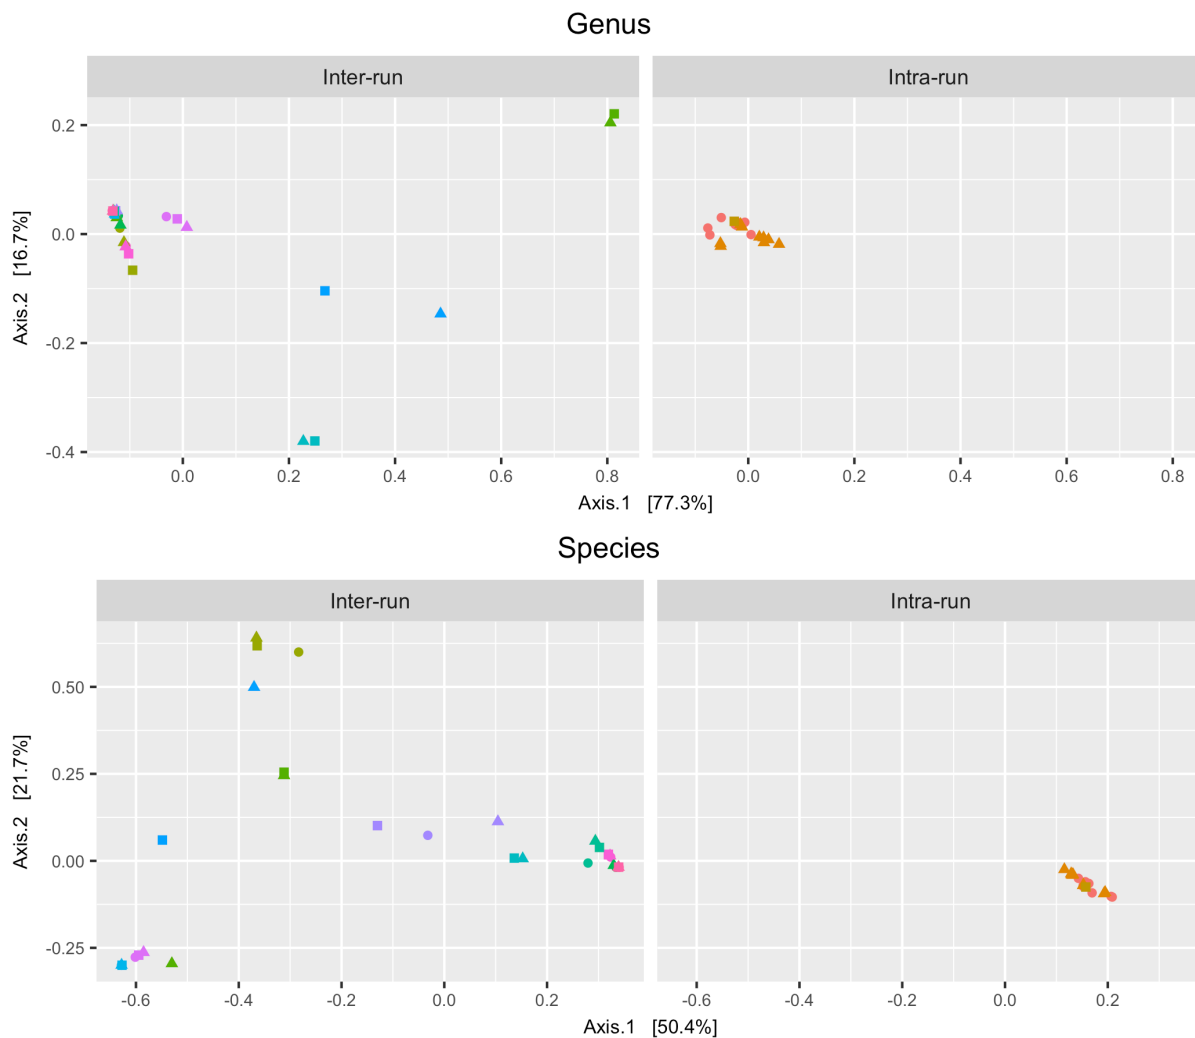

522

523

524 **Figure 4. Inter- and intra-run reproducibility.** PCoA ordination showing clustering of inter-run (11  
525 vaginal samples analyzed in triplicate on three independent sequencing runs) and intra-run (18 aliquots of  
526 the same vaginal pool) data, at the genus and species taxonomic level. Shapes indicate the sequencing  
527 run, while colors indicate sample replicates.

528

529

530 For the inter-run analysis, a total set of 11 groups of replicates (at least two  
531 samples) passed the filtering criteria (over 10,000 reads). The PCoA visualization at  
532 genus and species level showed a dispersion of the different samples, but with a  
533 clustering according to the respective replicates (Figure 4). This suggests that there is  
534 limited within-sample variation when the same samples are processed on different days  
535 by different operators.

## 536 Relative abundance of 32 bacterial targets in healthy vaginal samples

537 To determine healthy reference ranges for the bacterial targets in the assay, we  
538 selected a set of 50 samples from our database. These represent self-reported healthy  
539 individuals from the uBiome microbiome research study. In addition to health status,  
540 additional selection criteria included no usage of antibiotics six months prior, and no  
541 current urinary tract or vaginal infections, including the presence of STDs. The 50  
542 samples were processed with the target database, and the relative abundance ranges  
543 for each bacterial target in the cohort are shown (Figure 5).

544

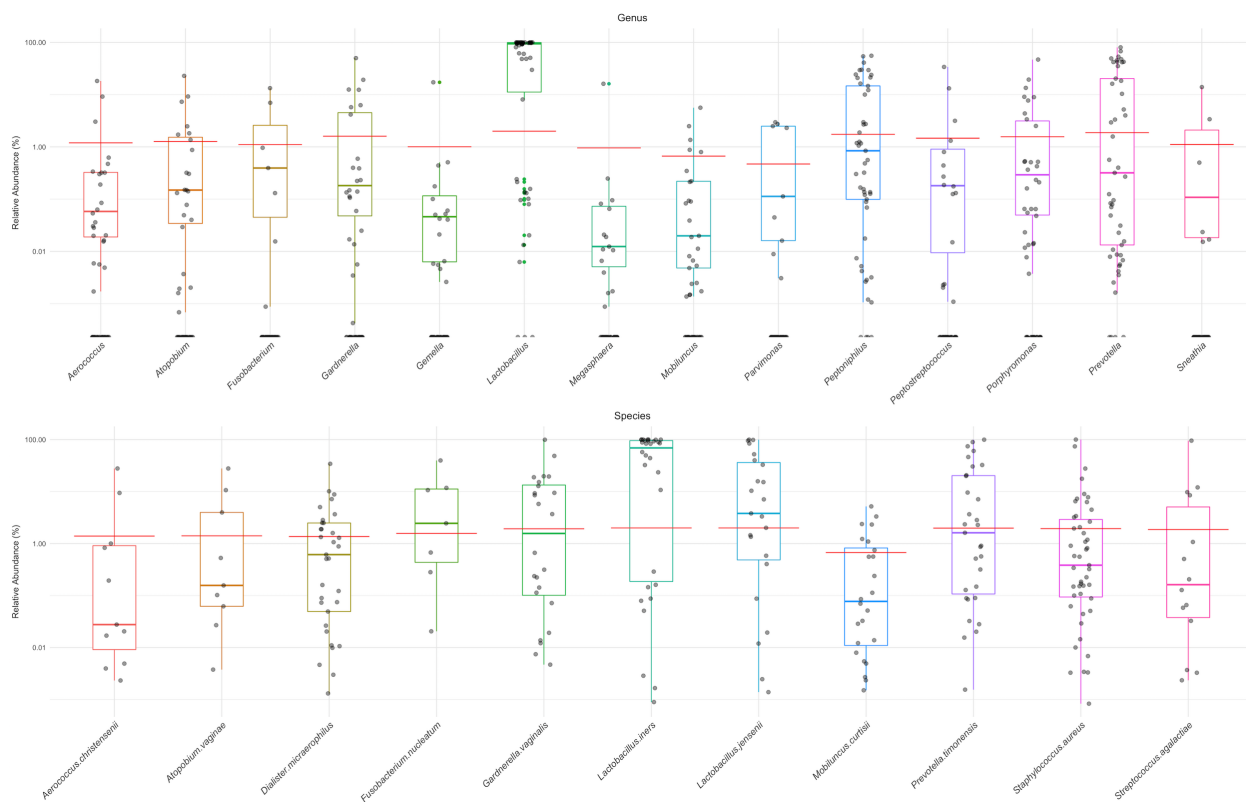

545

546

547 **Figure 5. Healthy ranges for the bacterial targets in the assay.** A set of 50 vaginal samples, each from  
548 a different woman, was selected based on the self-reported answers given to survey questions indicating  
549 general and vaginal health. Each dot represents the relative abundance of a different bacterial target on  
550 genus level (top) or species level (bottom) within a different vaginal sample. Boxes indicate the 25th-76th  
551 percentile, with the median indicated inside each colored box. Red line indicates the 99% confidence  
552 interval of each distribution. Not all of the taxa used in the assay were plotted, as some had no  
553 abundance values for this healthy cohort (*Papillibacter*, *C. trachomatis*, *M. mulieris*, *M. genitalium*, *N.*  
554 *gonorrhoeae*, *P. amnii*, *T. pallidum*), based on the exclusion criteria.

555 As expected, given the nature of the samples, *Lactobacillus* was the most  
556 abundant genus, with the widest abundance distribution. At the species level, a similar  
557 distribution of the relative abundances was found, including a wide range and a high  
558 relative abundance for *Lactobacillus iners*.

559

## 560 Pathogen detection

561 Among the 32 bacterial targets in the assay are four pathogens implicated in STI:  
562 *C. trachomatis*, *N. gonorrhoeae*, *M. genitalium*, and *T. pallidum*. The performance of the  
563 assay to detect two of these pathogens was confirmed on a set of ten clinical samples  
564 available through a commercial source, five of which were positive for *C. trachomatis*,  
565 and five of which were positive for *N. gonorrhoeae*. A vaginal pool consisting of samples  
566 derived from 11 healthy individuals was included as a control sample, and was found to  
567 be negative (Figure 6).

568

569

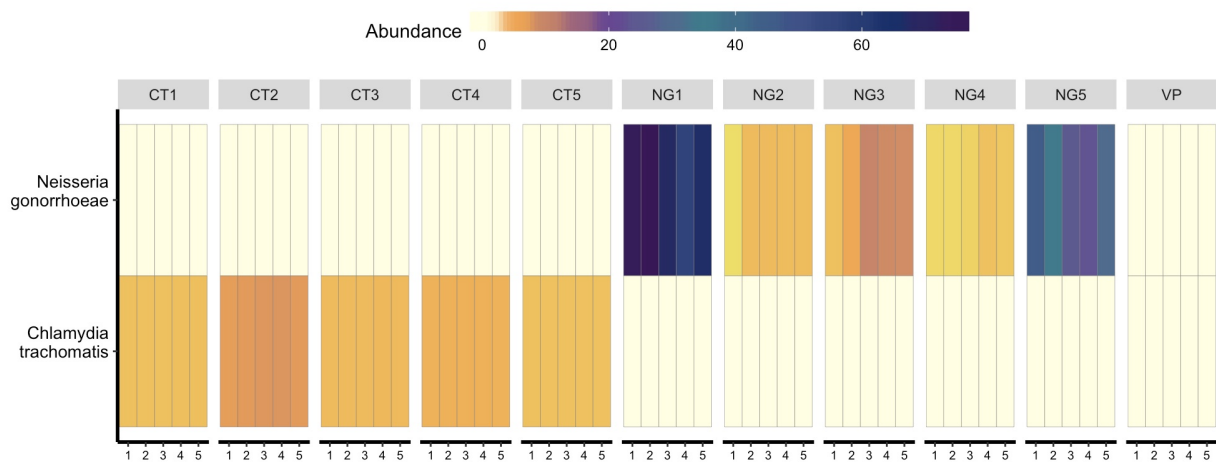

570

571

572 **Figure 6. Experimental validation of 16S rRNA gene sequencing for pathogen detection using**  
573 **verification samples.** Ten verification specimens (iSpecimen) containing either *C. trachomatis* (n=5) or  
574 *N. gonorrhoeae* (n=5), as well as a vaginal pool (VP) constructed by combining 96 vaginal samples from  
575 11 individuals, were tested for the presence of either pathogen using 16S rRNA gene amplification and  
576 sequencing. Five replicates of each specimen were tested. The heatmap shows the relative abundance of  
577 the two pathogens in each replicate experiment, on a scale from light yellow (absent) to dark blue (100%  
578 relative abundance).

579 The four STI-associated targets (*C. trachomatis*, *M. genitalium*, *N. gonorrhoeae*, and *T.*  
580 *pallidum*) were not present in any of the 50 samples from the healthy subject set (see  
581 also below), nor in a set of 88 vaginal samples used to validate the performance of the  
582 Digene test on extracted DNA (see below). In a set of 185 samples used to compare the  
583 HPV genotyping part of the assay to the Digene test (see below), *C. trachomatis* was  
584 present in one of the samples, while the other STI targets were not found.

585

### 586 **Performance of Digene HC2 HPV test on extracted DNA**

587 In order to validate the use of the Digene kit on extracted vaginal DNA, we  
588 compared the performance of the Digene HC2 HPV assay on a set of 88 self-obtained,  
589 paired vaginal samples, i.e. a Digene brush resuspended in Digene STM, as well as  
590 DNA extracted from a paired vaginal swab resuspended in lysis transport medium. Of  
591 the 88 samples, 85 showed concordant results (70 were negative and 15 were positive  
592 for HPV in both tests) (Table 1). Three sample pairs that were positive with the Digene  
593 brush were HPV negative when the corresponding test was performed on extracted  
594 DNA. These three samples had an average Digene RLU ratio of 1.94, suggesting that  
595 these contained low levels of HPV (Figure 7).

596

597 **Table 1: Digene HC2 High-Risk HPV assay performance on a set of 88 paired, self-collected**  
598 **vaginal samples.** One set of samples was collected using a Digene brush resuspended in Digene  
599 Specimen Transport medium (“Digene STM”), and the second set was extracted DNA from swabs  
600 suspended in tubes with lysis/stabilization buffer (“Digene DNA”). Samples were considered to be hrHPV  
601 positive if the RLU ratio was 1 or more. Agreement between Digene STM and Digene DNA was of 96.6%,  
602 while concordance by Cohen’s Kappa was  $0.89 \pm 0.12$  ( $Z=8.39$ ,  $p\text{-value}=0.0001$ ).

603

|                           | <b>Digene DNA<br/>hrHPV -</b> | <b>Digene DNA<br/>hrHPV +</b> | <b>Sum</b> |
|---------------------------|-------------------------------|-------------------------------|------------|
| <b>Digene STM hrHPV -</b> | 70                            | 0                             | 70         |
| <b>Digene STM hrHPV +</b> | 3                             | 15                            | 18         |
| <b>Sum</b>                | 73                            | 15                            | 88         |

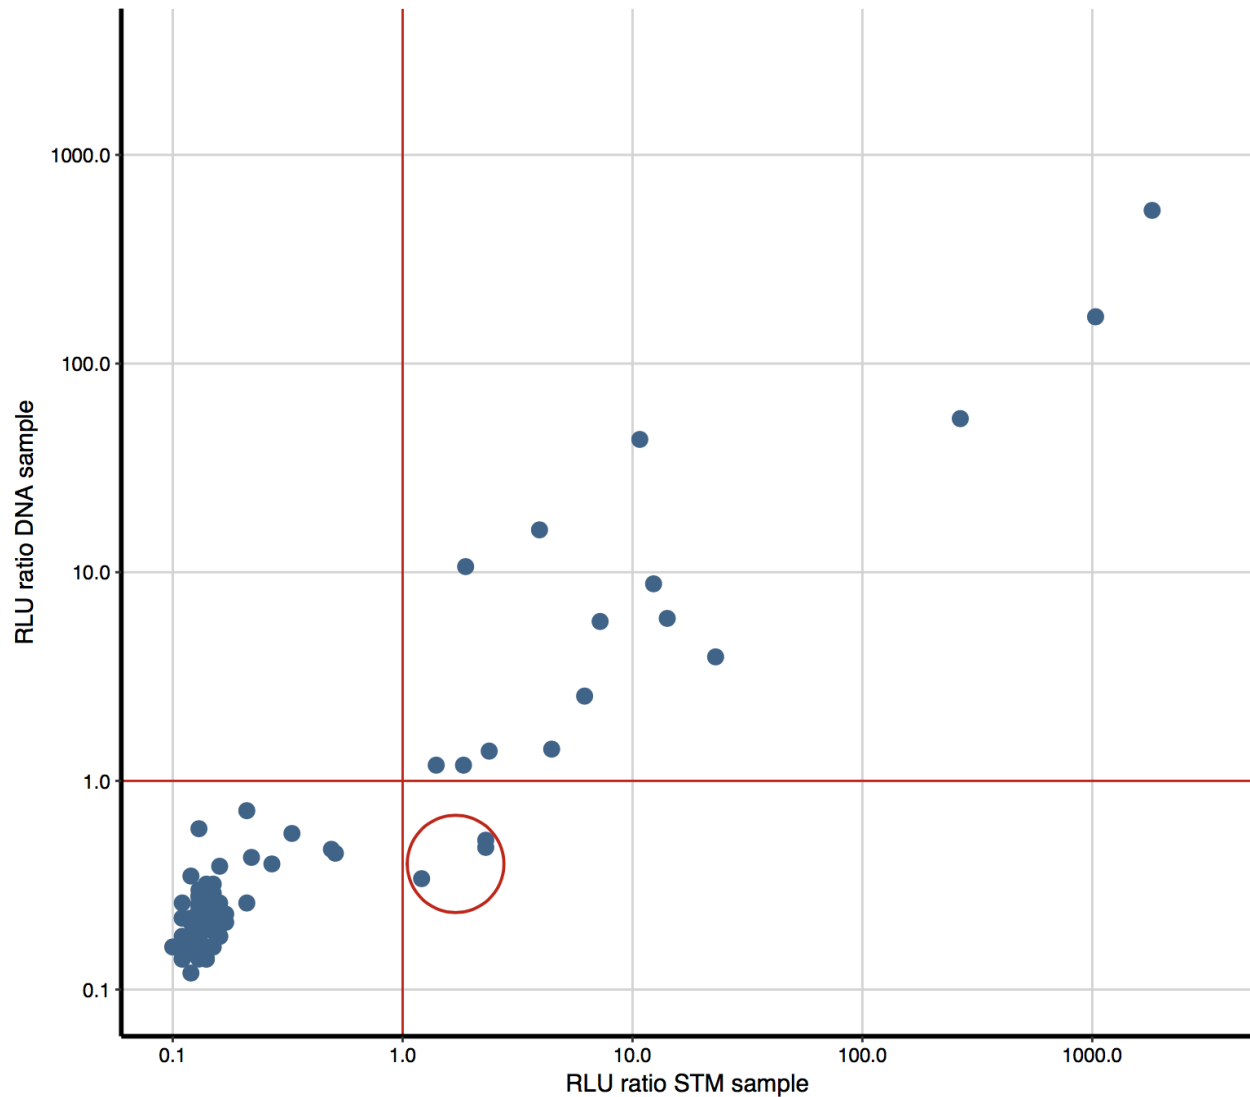

604  
605  
606  
607  
608  
609  
610  
611  
612  
613

**Figure 7. Digene HC2 High-Risk HPV assay performance on a set of 88 paired, self-collected vaginal samples.** Samples were tested directly from STM tubes (X axis) or from a paired sample after DNA extraction (Y axis). The red lines show the cutoff of the Digene assay (RLU ratio = 1). The red circle highlights three STM specimens that were positive for hrHPV with an average RLU ratio of <2 (low positive), but below RLU ratio=1 for their corresponding extracted DNA specimen. The results for all other 85 specimens were concordant.



614 **Performance of the HPV sequencing test on clinical samples**

615 Using 185 vaginal specimens, the performance of the assay to detect hrHPV was  
616 compared to that of the Digene HC2 hrHPV assay. The Digene test was considered  
617 positive if the measured RLU was equal to or greater than the assay's cutoff (RLU ratio  
618 of 1 or higher), as per the manufacturer's instructions. The assay was considered to be  
619 positive for hrHPV if the normalized number of reads assigned to hrHPV types divided  
620 by the number of reads assigned to a spiked-in control was greater than 0.1. Of the 185  
621 samples, 145 were negative in both tests, while 36 were positive in both tests (Table 2),  
622 with an overall agreement of 97.83%, Cohen's kappa =  $0.93 \pm 0.064$ . Two samples  
623 were positive in the Digene HC2 hrHPV assay but did not yield any hrHPV reads after  
624 amplification and sequencing by our assay. Of these two false negatives, however, one  
625 contained hrHPV 61, and the other one contained both hrHPV 30 and hrHPV 61. Although  
626 these two hrHPV types were not validated for our assay, their sequences were identified  
627 after amplification and genotyping. Two false positive samples were negative in the  
628 Digene HC2 hrHPV assay but yielded sufficient hrHPV reads to be identified as  
629 positives by our genotyping assay. One of these samples contained hrHPV type 35, and  
630 the other contained hrHPV type 68. Thus, in comparison to the Digene HC2 hrHPV test,  
631 the hrHPV sequencing assay had a sensitivity of 94.74% and a specificity of 98.64%.

632  
633 **Table 2. Comparison of the women's health assay for the detection of genotyped hrHPV in DNA**  
634 **extracted from 185 vaginal samples to that of the Digene HC2 hrHPV assay.** Concordance by  
635 Cohen's kappa ( $0.93 \pm 0.064$ ,  $Z = 12.7$ ,  $p\text{-value}=0.0001$ ), shows that the two test are in excellent  
636 agreement.

637

|                       | <b>Genotyping<br/>hrHPV -</b> | <b>Genotyping<br/>hrHPV +</b> | <b>Sum</b> |
|-----------------------|-------------------------------|-------------------------------|------------|
| <b>Digene hrHPV -</b> | 145                           | 2                             | 147        |
| <b>Digene hrHPV +</b> | 2                             | 36                            | 38         |
| <b>Sum</b>            | 147                           | 38                            | 185        |

638

639           Excellent correlation was found between the number of normalized hrHPV  
640 sequencing reads and the Digene HC2 hrHPV RLU ratios, confirming that the PCR and  
641 sequencing hrHPV assay described here can not only detect hrHPV types but also  
642 assess their relative abundance (Figure 8).

643  
644  
645

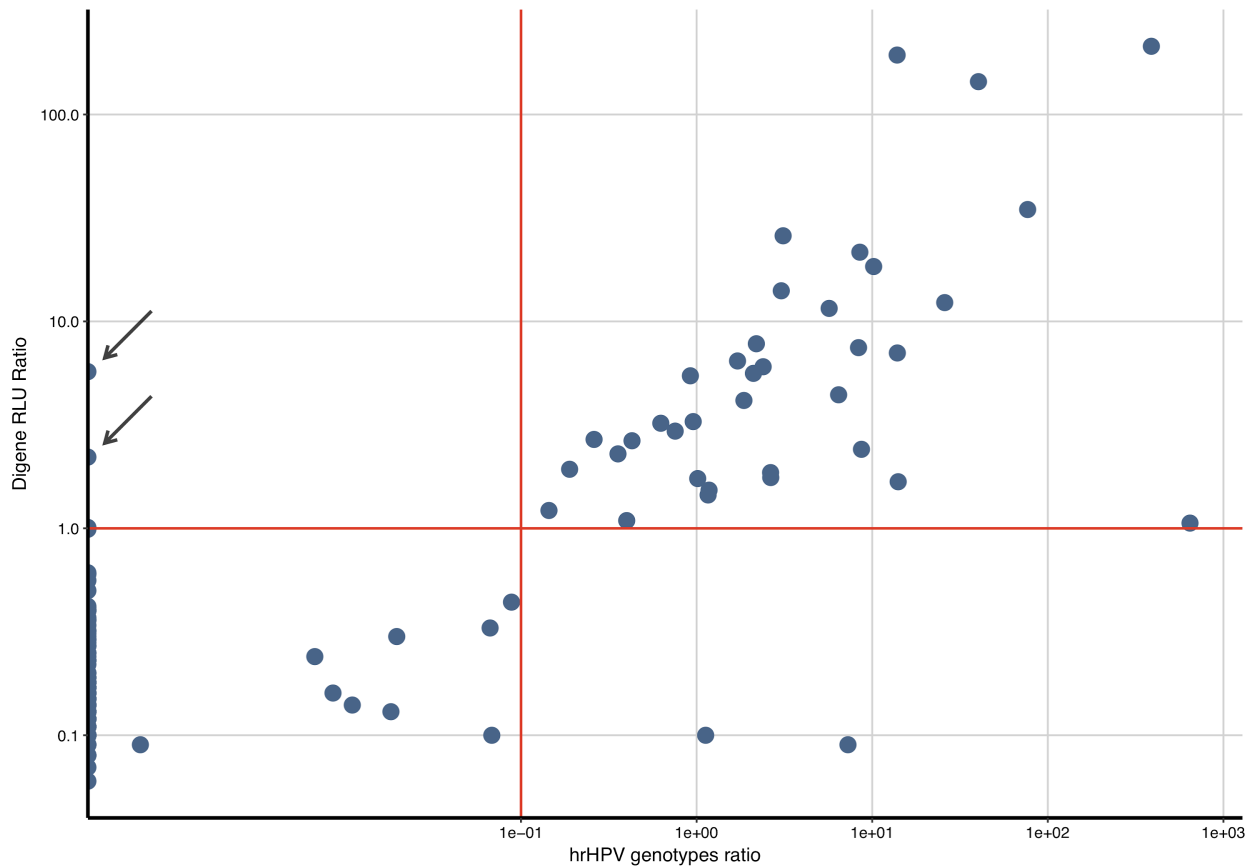

646  
647  
648 **Figure 8. Comparison of hrHPV amplification and sequencing to the Digene HC2 hrHPV assay.**  
649 DNA from 185 vaginal samples was extracted and tested by PCR amplification and sequencing using  
650 HPV primers, and additionally used directly in the Digene assay using the HC2 hrHPV probe mix. For  
651 each sample, X-axis shows the normalized ratio of reads assigned to hrHPV to reads assigned to a  
652 spiked-in internal control, while the Y-axis shows the Digene hrHPV probe RLU values normalized over  
653 the assay's cut-off RLU. The red lines show the cutoff for each of the assays. Two samples that were  
654 positive in the Digene hrHPV assay but in which no hrHPV sequences could be detected are pointed out  
655 with arrows.

## 656 Discussion

657

658 Here, we describe a novel women's health assay combining vaginal microbiome  
659 analysis, STI-associated pathogen detection, and HPV detection and identification in a  
660 self-sampling format. Although each of these components have been described before,  
661 to our knowledge, this assay is the first to combine all of these parts, thus offering  
662 women a unique opportunity to gain a broad perspective into their vaginal and  
663 reproductive health.

664 The detection of hrHPV in combination with self-sampling has been proposed as  
665 an effective method for cervical cancer risk screening. Although the sensitivity of signal-  
666 based hrHPV detection, such as the Digene assay, in self-obtained vaginal swabs has  
667 been found to be slightly lower than that in clinician-obtained cervical specimens, hrHPV  
668 detection based on PCR was shown to be equally sensitive in self-sampled specimens  
669 (Arbyn et al. 2014). While this assay is not intended to replace regular cervical cancer  
670 screening programs, offering women the opportunity to self-collect vaginal specimens  
671 poses fewer barriers for women to be screened, and thus could lead to increased  
672 participation rates. Therefore, encouraging women to self-collect vaginal samples for  
673 hrHPV screening, as already implemented in numerous countries, and recommending  
674 them to seek further physician examination in case of a positive result, while  
675 encouraging them to participate in regular screening programs may have a positive  
676 impact on rates of detection of cervical cancer, and potentially save lives (Wong et al.  
677 2016).

678 Unlike most currently available clinical assays, this assay not only detects  
679 whether hrHPV is present in a sample, but also identifies the presence of specific  
680 type(s) by using sequencing analysis. This is of particular importance because the  
681 prevalence of hrHPV types might shift in the setting of recently introduced HPV  
682 vaccines. In the last decade, many countries, including the US, have implemented HPV  
683 vaccination programs (Harper and DeMars 2017) and the prevalence among young  
684 women of hrHPV types covered by these vaccines such as HPV types 16 and 18 is  
685 rapidly dropping (Drolet et al. 2015). It is too early to know if other HPV types might  
686 become more prevalent, but sequence-based HPV detection offers the ability to detect

687 types that are not covered by tests that focus on the detection of a limited number of  
688 types.

689         Several other HPV genotyping assays based on PCR and sequencing have been  
690 reported (Gradissimo and Burk 2017). Oliveira Carvalho and coworkers showed that  
691 their PCR and sequencing-based method was 4-fold more likely to identify the viral type  
692 in hrHPV positive samples than type-specific PCR (Carvalho et al. 2010). Another study  
693 showed that the use of sequencing detected HPV types not found by traditional  
694 methods, with a detection specificity of 100% in comparison with PCR and p16  
695 immunohistochemistry (Conway et al. 2012). Using 454 sequencing of PCR amplicons  
696 and artificial and clinical sample sets, Militello et al. found that HPV sequencing  
697 performed well and was capable to detect infections with multiple types and even detect  
698 novel types, compared to other assays including the Digene HC2 test (Militello et al.  
699 2013). A more recent study compared the use of ion-torrent sequencing with the Linear  
700 Array (LA) method for genotyping of anal hrHPV (Nowak et al. 2017). This study  
701 showed that the sequencing method was accurate and able to detect variants that LA  
702 did not, and that it could detect multiple types in multiple HPV infections. Ambulos et al.  
703 showed high sensitivity of a sequencing-based HPV genotyping assay performed on  
704 formalin-fixed paraffin-embedded oropharyngeal and cervical specimens from subjects  
705 with cancer; this method showed high concordance (92%) in comparison with LA-based  
706 genotyping (Ambulos et al. 2016). Thus, HPV detection by PCR and sequencing shows  
707 excellent performance in comparison to currently used clinical assays.

708         As recommended by the VALGENT study framework (Arbyn et al. 2016), we  
709 compared the performance of the HPV component of the test to that of the widely used  
710 Digene HC2 hrHPV assay. Because the novel test reported here is performed on  
711 extracted DNA, we first validated the use of the Digene assay on extracted DNA. The  
712 Digene performance on the extracted DNA was slightly less sensitive than that directly  
713 performed on the Digene STM tubes; 3 out of 18 samples that tested positive in the  
714 Digene assay on STM tubes subsequently tested negative on their corresponding  
715 extracted DNA. The Digene HC2 assay has been found to give discordant results in  
716 about 8% of paired tests (Carozzi et al. 2005; Castle et al. 2002), where, for example, a  
717 positive sample will test negative at retesting, and the majority of those samples will

718 have a low RLU ratio between 1.00 and 3.00 in the positive test. Reproducibility testing  
719 using the Digene assay therefore is expected to be lowest in samples with an RLU ratio  
720 near the cutoff value, and a cutoff ratio of 2 or 3 instead of 1 has been proposed to  
721 serve as a better indicator for reproducible positive results (Carozzi et al. 2005, Castle  
722 et al. 2002, de Cremoux et al. 2003, Moss et al. 2015). In our study, all specimens with  
723 RLU ratios of 2 or higher in the direct Digene test on STM tubes were also correctly  
724 identified as positive when the test was performed on extracted DNA, suggesting that  
725 the Digene assay can be applied to extracted DNA as well.

726 Using extracted DNA from 185 vaginal specimens as the template, the  
727 performance of the hrHPV sequencing assay was compared to that of the Digene HC2  
728 hrHPV assay. The hrHPV sequencing assay had excellent correlation with the Digene  
729 assay, with a sensitivity and specificity of 94.74% and 98.64%, respectively, and a  
730 Cohen's kappa of 0.93. In addition, the two tests were in good general agreement about  
731 the relative amount of HPV molecules detected. Of the two samples that were reported  
732 positive by the Digene assay but that did not contain hrHPV sequences as determined  
733 by our assay, both of them were found to contain lrHPV types. Cross-reactivity of the  
734 Digene HC2 hrHPV probe mix with lrHPV sequences such as 30 and 61 has been  
735 demonstrated by several others (Boehmer et al. 2014; de Cremoux et al. 2003; Gillio-  
736 Tos et al. 2013; Ginocchio et al. 2008; Vernon et al. 2000). Thus, even though these  
737 samples had to be classified as false-negative because the Digene assay was taken as  
738 the gold standard, it is likely they were actually false-positives in the Digene test.

739 In addition to the HPV portion of the novel women's health assay described here,  
740 the assay also reports the relative abundance of commensal and pathogenic bacteria in  
741 vaginal samples. Self-collection has been shown to be well-suited for vaginal  
742 microbiome analysis as reported by Forney et al. who showed that microbial diversity is  
743 similar between self-collected and physician collected vaginal samples (Forney 2010).

744 Several bacteria have been associated with vaginal health conditions, such as  
745 bacterial vaginosis (Ling et al. 2010, Ravel et al. 2011, Ravel and Wommack 2014,  
746 Srinivasan et al. 2012), aerobic vaginitis (Donders et al. 2017), pelvic inflammatory  
747 disease (Brunham et al. 2015), and sexually transmitted infections (Hill et al. 2016;  
748 Jensen 2017; Petrova et al. 2015, Ziklo et al. 2016). The women's health assay

749 described here detects the relative abundance of bacteria positively associated with  
750 bacterial vaginosis, such as *Sneathia* or *Gardnerella* species, as well as those  
751 negatively associated with that condition such as *Lactobacillus* species. In addition, it  
752 detects the presence of four common STI-associated pathogens, i.e., *C. trachomatis*, *N.*  
753 *gonorrhoeae*, *M. genitalium*, and *T. pallidum*. Of these, *M. genitalium* has been recently  
754 recognized as an important pathogen implicated in pelvic inflammatory disease and  
755 infertility (Jensen 2017; Wiesenfeld and Manhart 2017). Although some early diagnostic  
756 tests have been described (Gaydos 2017, Munson 2017), very few clinicians test for its  
757 presence. Furthermore, the vaginal microbiota composition has been reported to be  
758 associated with the progression of HPV infection, from early states to cervical cancer  
759 (Brotman 2014, Mitra et al. 2016). Vaginal microbiome analysis therefore not only can  
760 be used to detect STI-associated pathogens and bacteria involved in bacterial  
761 vaginosis, but also to assess a woman's microbiome similarity to the microbiome of a  
762 group of individuals with progressed HPV infection. This brings about the opportunity to  
763 leverage microbiome information to understand HPV infection progression and women's  
764 susceptibility to cancer development.

765 In conclusion, we here present a women's health assay that for the first time  
766 combines the detection of the most important bacterial and viral indicators of vaginal  
767 health and disease. We envision that this test will greatly help women to learn about  
768 their vaginal microbiome, encourage them to participate in existing cervical screening  
769 programs because it allows for self-sampling, and assist their doctors to more  
770 accurately diagnose and treat diseases of the genital tract.

771

## 772 References

773

- 774 1. Almonacid, D.E., Kraal, L., Ossandon, F.J., Budovskaya, Y.V., Cardenas, J.P., Bik, E.M.,  
775 Goddard, A.D., Richman, J. and Apte, Z.S. 2017. 16S rRNA gene sequencing and healthy  
776 reference ranges for 28 clinically relevant microbial taxa from the human gut microbiome. Plos  
777 One 12(5), p. e0176555.
- 778 2. Ambulos, N.P., Schumaker, L.M., Mathias, T.J., White, R., Troyer, J., Wells, D. and Cullen, K.J.  
779 2016. Next-Generation Sequencing-Based HPV Genotyping Assay Validated in Formalin-Fixed,  
780 Paraffin-Embedded Oropharyngeal and Cervical Cancer Specimens. Journal of Biomolecular

- 781           Techniques 27(2), pp. 46–52.
- 782           3. Arbyn, M., Depuydt, C., Benoy, I., Bogers, J., Cuschieri, K., Schmitt, M., Pawlita, M., Geraets, D.,  
783            Heard, I., Gheit, T., Tommasino, M., Poljak, M., Bonde, J. and Quint, W. 2016. VALGENT: A  
784            protocol for clinical validation of human papillomavirus assays. *Journal of Clinical Virology* 76  
785            Suppl 1, pp. S14–21.
- 786           4. Arbyn, M., Verdoodt, F., Snijders, P.J.F., Verhoef, V.M.J., Suonio, E., Dillner, L., Minozzi, S.,  
787            Bellisario, C., Banzi, R., Zhao, F.-H., Hillemanns, P. and Anttila, A. 2014. Accuracy of human  
788            papillomavirus testing on self-collected versus clinician-collected samples: a meta-analysis. *The*  
789            *Lancet Oncology* 15(2), pp. 172–183.
- 790           5. Boehmer, G., Wang, L., Iftner, A., Holz, B., Haedicke, J., Wasielewski, R. von, Martus, P. and  
791            Iftner, T. 2014. A population-based observational study comparing Cervista and Hybrid Capture 2  
792            methods: improved relative specificity of the Cervista assay by increasing its cut-off. *BMC*  
793            *Infectious Diseases* 14, p. 674.
- 794           6. Bolger, A.M., Lohse, M. and Usadel, B. 2014. Trimmomatic: a flexible trimmer for Illumina  
795            sequence data. *Bioinformatics* 30(15), pp. 2114–2120.
- 796           7. Bosch, F.X. and Muñoz, N. 2002. The viral etiology of cervical cancer. *Virus Research* 89(2), pp.  
797            183–190.
- 798           8. Bouvard, V., Baan, R., Straif, K., Grosse, Y., Secretan, B., Ghissassi, F. El, Benbrahim-Tallaa, L.,  
799            Guha, N., Freeman, C., Galichet, L., Coglianò, V. and WHO International Agency for Research on  
800            Cancer Monograph Working Group 2009. A review of human carcinogens--Part B: biological  
801            agents. *The Lancet Oncology* 10(4), pp. 321–322.
- 802           9. Bray, F., Ren, J.-S., Masuyer, E. and Ferlay, J. 2013. Global estimates of cancer prevalence for  
803            27 sites in the adult population in 2008. *International Journal of Cancer* 132(5), pp. 1133–1145.
- 804           10. Brotman, R.M., Shardell, M.D., Gajer, P., Tracy, J.K., Zenilman, J.M., Ravel, J. and Gravitt, P.E.  
805            2014. Interplay between the temporal dynamics of the vaginal microbiota and human  
806            papillomavirus detection. *The Journal of Infectious Diseases* 210(11), pp. 1723–1733.
- 807           11. Brunham, R.C., Gottlieb, S.L. and Paavonen, J. 2015. Pelvic inflammatory disease. *The New*  
808            *England Journal of Medicine* 372(21), pp. 2039–2048.
- 809           12. Caporaso, J.G., Lauber, C.L., Walters, W.A., Berg-Lyons, D., Lozupone, C.A., Turnbaugh, P.J.,  
810            Fierer, N. and Knight, R. 2011. Global patterns of 16S rRNA diversity at a depth of millions of  
811            sequences per sample. *Proceedings of the National Academy of Sciences of the United States of*  
812            *America* 108 Suppl 1, pp. 4516–4522.
- 813           13. Carozzi, F.M., Mistro, A.D., Confortini, M., Sani, C., Puliti, D., Trevisan, R., De Marco, L., Tos,  
814            A.G., Girlando, S., Palma, P.D., Pellegrini, A., Schiboni, M.L., Crucitti, P., Pierotti, P., Vignato, A.  
815            and Ronco, G. 2005. Reproducibility of HPV DNA testing by hybrid capture 2 in a screening  
816            setting. *American Journal of Clinical Pathology* 124(5), pp. 716–721.
- 817           14. Carvalho, N. de O., del Castillo, D.M., Perone, C., Januário, J.N., Melo, V.H. de and Brasileiro

- 818 Filho, G. 2010. Comparison of HPV genotyping by type-specific PCR and sequencing. *Memorias*  
819 *do Instituto Oswaldo Cruz* 105(1), pp. 73–78.
- 820 15. Castle, P.E., Lorincz, A.T., Mielzynska-Lohnas, I., Scott, D.R., Glass, A.G., Sherman, M.E.,  
821 Schussler, J.E. and Schiffman, M. 2002. Results of human papillomavirus DNA testing with the  
822 hybrid capture 2 assay are reproducible. *Journal of Clinical Microbiology* 40(3), pp. 1088–1090.
- 823 16. Clinical and Laboratory Standards Institute 2004. *Protocols for Determination of Limits of*  
824 *Detection and Limits of Quantitation, Approved Guideline*. Wayne, PA USA: CLSI; CLSI  
825 document EP17.
- 826 17. Committee on Practice Bulletins—Gynecology 2016. Practice bulletin no. 168: cervical cancer  
827 screening and prevention. *Obstetrics and Gynecology* 128(4), pp. e111–30.
- 828 18. Conway, C., Chalkley, R., High, A., Maclennan, K., Berri, S., Chengot, P., Alsop, M., Egan, P.,  
829 Morgan, J., Taylor, G.R., Chester, J., Sen, M., Rabbitts, P. and Wood, H.M. 2012. Next-  
830 generation sequencing for simultaneous determination of human papillomavirus load, subtype,  
831 and associated genomic copy number changes in tumors. *The Journal of Molecular Diagnostics*  
832 14(2), pp. 104–111.
- 833 19. de Cremoux, P., Coste, J., Sastre-Garau, X., Thioux, M., Bouillac, C., Labbé, S., Cartier, I., Ziol,  
834 M., Dosda, A., Le Galès, C., Molinié, V., Vacher-Lavenu, M.-C., Cochand-Priollet, B., Vielh, P.,  
835 Magdelénat, H. and for the French Society of Clinical Cytology Study Group 2003. Efficiency of  
836 the hybrid capture 2 HPV DNA test in cervical cancer screening. *American Journal of Clinical*  
837 *Pathology* 120(4), pp. 492–499.
- 838 20. Donders, G.G.G., Bellen, G., Grinceviciene, S., Ruban, K. and Vieira-Baptista, P. 2017. Aerobic  
839 vaginitis: no longer a stranger. *Research in Microbiology*.
- 840 21. Van Doorslaer, K., Li, Z., Xirasagar, S., Maes, P., Kaminsky, D., Liou, D., Sun, Q., Kaur, R.,  
841 Huyen, Y. and McBride, A.A. 2017. The Papillomavirus Episteme: a major update to the  
842 papillomavirus sequence database. *Nucleic Acids Research* 45(D1), pp. D499–D506.
- 843 22. Van Doorslaer, K., Tan, Q., Xirasagar, S., Bandaru, S., Gopalan, V., Mohamoud, Y., Huyen, Y.  
844 and McBride, A.A. 2013. The Papillomavirus Episteme: a central resource for papillomavirus  
845 sequence data and analysis. *Nucleic Acids Research* 41(Database issue), pp. D571–8.
- 846 23. Drolet, M., Bénard, É., Boily, M.-C., Ali, H., Baandrup, L., Bauer, H., Beddows, S., Brisson, J.,  
847 Brotherton, J.M.L., Cummings, T., Donovan, B., Fairley, C.K., Flagg, E.W., Johnson, A.M., Kahn,  
848 J.A., Kavanagh, K., Kjaer, S.K., Kliewer, E.V., Lemieux-Mellouki, P., Markowitz, L., Mboup, A.,  
849 Mesher, D., Niccolai, L., Oliphant, J., Pollock, K.G., Soldan, K., Sonnenberg, P., Tabrizi, S.N.,  
850 Tanton, C. and Brisson, M. 2015. Population-level impact and herd effects following human  
851 papillomavirus vaccination programmes: a systematic review and meta-analysis. *The Lancet*  
852 *Infectious Diseases* 15(5), pp. 565–580.
- 853 24. Dzuba, I.G., Díaz, E.Y., Allen, B., Leonard, Y.F., Lazcano Ponce, E.C., Shah, K.V., Bishai, D.,  
854 Lorincz, A., Ferris, D., Turnbull, B., Hernández Avila, M. and Salmerón, J. 2002. The acceptability



- 855 of self-collected samples for HPV testing vs. the pap test as alternatives in cervical cancer  
856 screening. *Journal of women's health & gender-based medicine* 11(3), pp. 265–275.
- 857 25. Egawa, N. and Doorbar, J. 2017. The low-risk papillomaviruses. *Virus Research* 231, pp. 119–  
858 127.
- 859 26. Estrade, C. and Sahli, R. 2014. Comparison of Seegene Anyplex II HPV28 with the PGMY-CHUV  
860 assay for human papillomavirus genotyping. *Journal of Clinical Microbiology* 52(2), pp. 607–612.
- 861 27. Forney, L.J., Gajer, P., Williams, C.J., Schneider, G.M., Koenig, S.S.K., McCulle, S.L., Karlebach,  
862 S., Brotman, R.M., Davis, C.C., Ault, K. and Ravel, J. 2010. Comparison of self-collected and  
863 physician-collected vaginal swabs for microbiome analysis. *Journal of Clinical Microbiology* 48(5),  
864 pp. 1741–1748.
- 865 28. Gao, W., Weng, J., Gao, Y. and Chen, X. 2013. Comparison of the vaginal microbiota diversity of  
866 women with and without human papillomavirus infection: a cross-sectional study. *BMC Infectious*  
867 *Diseases* 13, p. 271.
- 868 29. Gaydos, C.A. 2017. *Mycoplasma genitalium*: Accurate Diagnosis Is Necessary for Adequate  
869 Treatment. *The Journal of Infectious Diseases* 216(suppl\_2), pp. S406–S411.
- 870 30. Gillio-Tos, A., De Marco, L., Carozzi, F.M., Del Mistro, A., Girlando, S., Burrioni, E., Frayle-  
871 Salamanca, H., Giorgi Rossi, P., Pierotti, P., Ronco, G. and New Technologies for Cervical  
872 Cancer Screening Working Group 2013. Clinical impact of the analytical specificity of the hybrid  
873 capture 2 test: data from the New Technologies for Cervical Cancer (NTCC) study. *Journal of*  
874 *Clinical Microbiology* 51(9), pp. 2901–2907.
- 875 31. Ginocchio, C.C., Barth, D. and Zhang, F. 2008. Comparison of the Third Wave Invader human  
876 papillomavirus (HPV) assay and the digene HPV hybrid capture 2 assay for detection of high-risk  
877 HPV DNA. *Journal of Clinical Microbiology* 46(5), pp. 1641–1646.
- 878 32. Gorgos, L.M., Sycuro, L.K., Srinivasan, S., Fiedler, T.L., Morgan, M.T., Balkus, J.E., McClelland,  
879 R.S., Fredricks, D.N. and Marrazzo, J.M. 2015. Relationship of specific bacteria in the cervical  
880 and vaginal microbiotas with cervicitis. *Sexually Transmitted Diseases* 42(9), pp. 475–481.
- 881 33. Gradissimo, A. and Burk, R.D. 2017. Molecular tests potentially improving HPV screening and  
882 genotyping for cervical cancer prevention. *Expert Review of Molecular Diagnostics* 17(4), pp.  
883 379–391.
- 884 34. Gravitt, P.E., Peyton, C.L., Alessi, T.Q., Wheeler, C.M., Coutlée, F., Hildesheim, A., Schiffman,  
885 M.H., Scott, D.R. and Apple, R.J. 2000. Improved amplification of genital human  
886 papillomaviruses. *Journal of Clinical Microbiology* 38(1), pp. 357–361.
- 887 35. Harper, D.M. and DeMars, L.R. 2017. HPV vaccines - A review of the first decade. *Gynecologic*  
888 *Oncology* 0(0).
- 889 36. Heideman, D.A.M., Hesselink, A.T., Berkhof, J., van Kemenade, F., Melchers, W.J.G.,  
890 Daalmeijer, N.F., Verkuijten, M., Meijer, C.J.L.M. and Snijders, P.J.F. 2011. Clinical validation of  
891 the cobas 4800 HPV test for cervical screening purposes. *Journal of Clinical Microbiology* 49(11),

- 892 pp. 3983–3985.
- 893 37. Hill, S.A., Masters, T.L. and Wachter, J. 2016. Gonorrhoea - an evolving disease of the new  
894 millennium. *Microbial cell* 3(9), pp. 371–389.
- 895 38. IARC Working Group on the Evaluation of Carcinogenic Risks to Humans 2012. Biological  
896 agents. Volume 100 B. A review of human carcinogens. IARC monographs on the evaluation of  
897 carcinogenic risks to humans / World Health Organization, International Agency for Research on  
898 Cancer 100(Pt B), pp. 1–441.
- 899 39. Jemal, A., Bray, F., Center, M.M., Ferlay, J., Ward, E. and Forman, D. 2011. Global cancer  
900 statistics. *CA: A Cancer Journal for Clinicians* 61(2), pp. 69–90.
- 901 40. Jensen, J.S. 2017. *Mycoplasma genitalium*: yet another challenging STI. *The Lancet Infectious*  
902 *Diseases* 17(8), pp. 795–796.
- 903 41. Khan, M.J., Castle, P.E., Lorincz, A.T., Wacholder, S., Sherman, M., Scott, D.R., Rush, B.B.,  
904 Glass, A.G. and Schiffman, M. 2005. The elevated 10-year risk of cervical precancer and cancer  
905 in women with human papillomavirus (HPV) type 16 or 18 and the possible utility of type-specific  
906 HPV testing in clinical practice. *Journal of the National Cancer Institute* 97(14), pp. 1072–1079.
- 907 42. Lee, J.E., Lee, S., Lee, H., Song, Y.-M., Lee, K., Han, M.J., Sung, J. and Ko, G. 2013.  
908 Association of the vaginal microbiota with human papillomavirus infection in a Korean twin cohort.  
909 *Plos One* 8(5), p. e63514.
- 910 43. Levinson, K.L., Jernigan, A.M., Flocke, S.A., Tergas, A.I., Gunderson, C.C., Huh, W.K.,  
911 Wilkinson-Ryan, I., Lawson, P.J., Fader, A.N. and Belinson, J.L. 2016. Intimate partner violence  
912 and barriers to cervical cancer screening: A gynecologic oncology fellow research network study.  
913 *Journal of Lower Genital Tract Disease* 20(1), pp. 47–51.
- 914 44. Ling, Z., Kong, J., Liu, F., Zhu, H., Chen, X., Wang, Y., Li, L., Nelson, K.E., Xia, Y. and Xiang, C.  
915 2010. Molecular analysis of the diversity of vaginal microbiota associated with bacterial vaginosis.  
916 *BMC Genomics* 11, p. 488.
- 917 45. Lörincz, A.T. 1996. Hybrid capture<sup>TM</sup> method for detection of human papillomavirus DNA in  
918 clinical specimens: A tool for clinical management of equivocal pap smears and for population  
919 screening. *Journal of Obstetrics and Gynaecology Research* 22(6), pp. 629–636.
- 920 46. Mahé, F., Rognes, T., Quince, C., de Vargas, C. and Dunthorn, M. 2014. Swarm: robust and fast  
921 clustering method for amplicon-based studies. *PeerJ* 2, p. e593.
- 922 47. Manos, M.M., Ting, Y., Lewis, A.J., Broker, T.R. and Wolinsky, S.M. 1989. The use of polymerase  
923 chain reaction amplification for the detection of genital human papillomaviruses. *Cancer Cells*  
924 7:209–214.
- 925 48. Martin, M. 2011. Cutadapt removes adapter sequences from high-throughput sequencing reads.  
926 *EMBnet.journal* 17(1), p. 10.
- 927 49. Mayrand, M.-H., Duarte-Franco, E., Rodrigues, I., Walter, S.D., Hanley, J., Ferenczy, A., Ratnam,  
928 S., Coutlée, F., Franco, E.L. and Canadian Cervical Cancer Screening Trial Study Group 2007.

- 929 Human papillomavirus DNA versus Papanicolaou screening tests for cervical cancer. *The New*  
930 *England Journal of Medicine* 357(16), pp. 1579–1588.
- 931 50. McMurdie, P.J. and Holmes, S. 2013. phyloseq: an R package for reproducible interactive  
932 analysis and graphics of microbiome census data. *Plos One* 8(4), p. e61217.
- 933 51. Mendes, D., Bains, I., Vanni, T. and Jit, M. 2015. Systematic review of model-based cervical  
934 screening evaluations. *BMC Cancer* 15(1), p. 334.
- 935 52. Militello, V., Lavezzo, E., Costanzi, G., Franchin, E., Di Camillo, B., Toppo, S., Palù, G. and  
936 Barzon, L. 2013. Accurate human papillomavirus genotyping by 454 pyrosequencing. *Clinical*  
937 *Microbiology and Infection* 19(10), pp. E428–34.
- 938 53. Mitra, A., MacIntyre, D.A., Marchesi, J.R., Lee, Y.S., Bennett, P.R. and Kyrgiou, M. 2016. The  
939 vaginal microbiota, human papillomavirus infection and cervical intraepithelial neoplasia: what do  
940 we know and where are we going next? *Microbiome* 4(1), p. 58.
- 941 54. Moss, S.M., Bailey, A., Cubie, H., Denton, K., Sargent, A., Muir, P., Vipond, I.B., Winder, R. and  
942 Kitchener, H. 2015. Comparison of the performance of HPV tests in women with abnormal  
943 cytology: results of a study within the NHS cervical screening programme. *Cytopathology* 26(6),  
944 pp. 373–380.
- 945 55. Munson, E. 2017. Molecular Diagnostics Update for the Emerging (If Not Already Widespread)  
946 Sexually Transmitted Infection Agent *Mycoplasma genitalium*: Just About Ready for Prime Time.  
947 *Journal of Clinical Microbiology* 55(10), pp. 2894–2902.
- 948 56. Musselwhite, L.W., Oliveira, C.M., Kwaramba, T., de Paula Pantano, N., Smith, J.S., Fregnani,  
949 J.H., Reis, R.M., Mauad, E., Vazquez, F. de L. and Longatto-Filho, A. 2016. Racial/ethnic  
950 disparities in cervical cancer screening and outcomes. *Acta cytologica* 60(6), pp. 518–526.
- 951 57. National Center for Health Statistics. 2016. Health, United States, 2016: With Chartbook on Long-  
952 term Trends in Health. Hyattsville, MD.
- 953 58. Nowak, R.G., Ambulos, N.P., Schumaker, L.M., Mathias, T.J., White, R.A., Troyer, J., Wells, D.,  
954 Charurat, M.E., Bentzen, S.M. and Cullen, K.J. 2017. Genotyping of high-risk anal human  
955 papillomavirus (HPV): ion torrent-next generation sequencing vs. linear array. *Virology Journal*  
956 14(1), p. 112.
- 957 59. O’Hanlon, D.E., Moench, T.R. and Cone, R.A. 2013. Vaginal pH and microbicidal lactic acid when  
958 lactobacilli dominate the microbiota. *Plos One* 8(11), p. e80074.
- 959 60. Petrova, M.I., Lievens, E., Malik, S., Imholz, N. and Lebeer, S. 2015. Lactobacillus species as  
960 biomarkers and agents that can promote various aspects of vaginal health. *Frontiers in*  
961 *physiology* 6, p. 81.
- 962 61. Ravel, J., Brotman, R.M., Gajer, P., Ma, B., Nandy, M., Fadrosh, D.W., Sakamoto, J., Koenig,  
963 S.S., Fu, L., Zhou, X., Hickey, R.J., Schwebke, J.R. and Forney, L.J. 2013. Daily temporal  
964 dynamics of vaginal microbiota before, during and after episodes of bacterial vaginosis.  
965 *Microbiome* 1(1), p. 29.

- 966 62. Ravel, J., Gajer, P., Abdo, Z., Schneider, G.M., Koenig, S.S.K., McCulle, S.L., Karlebach, S.,  
967 Gorle, R., Russell, J., Tacket, C.O., Brotman, R.M., Davis, C.C., Ault, K., Peralta, L. and Forney,  
968 L.J. 2011. Vaginal microbiome of reproductive-age women. *Proceedings of the National Academy*  
969 *of Sciences of the United States of America* 108 Suppl 1, pp. 4680–4687.
- 970 63. Ravel, J. and Wommack, K.E. 2014. All hail reproducibility in microbiome research. *Microbiome*  
971 2(1), p. 8.
- 972 64. Reimers, L.L., Mehta, S.D., Massad, L.S., Burk, R.D., Xie, X., Ravel, J., Cohen, M.H., Palefsky,  
973 J.M., Weber, K.M., Xue, X., Anastos, K., Minkoff, H., Atrio, J., Souza, G. D', Ye, Q., Colie, C.,  
974 Zolnik, C.P., Spear, G.T. and Strickler, H.D. 2016. The Cervicovaginal Microbiota and Its  
975 Associations With Human Papillomavirus Detection in HIV-Infected and HIV-Uninfected Women.  
976 *The Journal of Infectious Diseases* 214(9), pp. 1361–1369.
- 977 65. de Roda Husman, A.M., Walboomers, J.M., van den Brule, A.J., Meijer, C.J. and Snijders, P.J.  
978 1995. The use of general primers GP5 and GP6 elongated at their 3' ends with adjacent highly  
979 conserved sequences improves human papillomavirus detection by PCR. *The Journal of General*  
980 *Virology* 76 ( Pt 4), pp. 1057–1062.
- 981 66. Rognes, T., Flouri, T., Nichols, B., Quince, C. and Mahé, F. 2016. VSEARCH: a versatile open  
982 source tool for metagenomics. *PeerJ* 4, p. e2584.
- 983 67. Rosa, M.I., Fachel, J.M.G., Rosa, D.D., Medeiros, L.R., Igansi, C.N. and Bozzetti, M.C. 2008.  
984 Persistence and clearance of human papillomavirus infection: a prospective cohort study.  
985 *American Journal of Obstetrics and Gynecology* 199(6), pp. 617.e1–7.
- 986 68. de Sanjose, S., Quint, W.G., Alemany, L., Geraets, D.T., Retrospective International Survey and  
987 HPV Time Trends Study Group, et al. 2010. Human papillomavirus genotype attribution in  
988 invasive cervical cancer: a retrospective cross-sectional worldwide study. *The Lancet Oncology*  
989 11(11), pp. 1048–1056.
- 990 69. Shannon, B., Yi, T.J., Perusini, S., Gajer, P., Ma, B., Humphrys, M.S., Thomas-Pavanel, J.,  
991 Chieza, L., Janakiram, P., Saunders, M., Tharao, W., Huibner, S., Shahabi, K., Ravel, J.,  
992 Rebbapragada, A. and Kaul, R. 2017. Association of HPV infection and clearance with  
993 cervicovaginal immunology and the vaginal microbiota. *Mucosal Immunology* 10(5), pp. 1310–  
994 1319.
- 995 70. Srinivasan, S., Hoffman, N.G., Morgan, M.T., Matsen, F.A., Fiedler, T.L., Hall, R.W., Ross, F.J.,  
996 McCoy, C.O., Bumgarner, R., Marrazzo, J.M. and Fredricks, D.N. 2012. Bacterial communities in  
997 women with bacterial vaginosis: high resolution phylogenetic analyses reveal relationships of  
998 microbiota to clinical criteria. *Plos One* 7(6), p. e37818.
- 999 71. Sultana, F., Mullins, R., English, D.R., Simpson, J.A., Drennan, K.T., Heley, S., Wrede, C.D.,  
1000 Brotherton, J.M.L., Saville, M. and Gertig, D.M. 2015. Women's experience with home-based self-  
1001 sampling for human papillomavirus testing. *BMC Cancer* 15(1), p. 849.
- 1002 72. Tambouret, R.H. 2013. The evolution of the Papanicolaou smear. *Clinical Obstetrics and*

- 1003           Gynecology 56(1), pp. 3–9.
- 1004       73. Tota, J.E., Bentley, J., Blake, J., Coutlée, F., Duggan, M.A., Ferenczy, A., Franco, E.L., Fung-  
1005       Kee-Fung, M., Gotlieb, W., Mayrand, M.-H., McLachlin, M., Murphy, J., Ogilvie, G. and Ratnam,  
1006       S. 2017. Introduction of molecular HPV testing as the primary technology in cervical cancer  
1007       screening: Acting on evidence to change the current paradigm. *Preventive Medicine* 98, pp. 5–14.
- 1008       74. US Preventive Services Task Force 2016. Final Update Summary: Cervical Cancer: Screening  
1009       [Online]. Available at: [https://www.uspreventiveservicestaskforce.org/Page/Document/Update](https://www.uspreventiveservicestaskforce.org/Page/Document/UpdateSummaryFinal/cervical-cancer-screening)  
1010       SummaryFinal/cervical-cancer-screening [Accessed: 2 November 2017].
- 1011       75. Verdoodt, F., Jentschke, M., Hillemanns, P., Racey, C.S., Snijders, P.J.F. and Arbyn, M. 2015.  
1012       Reaching women who do not participate in the regular cervical cancer screening programme by  
1013       offering self-sampling kits: a systematic review and meta-analysis of randomised trials. *European*  
1014       *Journal of Cancer* 51(16), pp. 2375–2385.
- 1015       76. Vernon, S.D., Unger, E.R. and Williams, D. 2000. Comparison of human papillomavirus detection  
1016       and typing by cycle sequencing, line blotting, and hybrid capture. *Journal of Clinical Microbiology*  
1017       38(2), pp. 651–655.
- 1018       77. Vidal, A.C., Smith, J.S., Valea, F., Bentley, R., Gradison, M., Yarnall, K.S.H., Ford, A., Overcash,  
1019       F., Grant, K., Murphy, S.K. and Hoyo, C. 2014. HPV genotypes and cervical intraepithelial  
1020       neoplasia in a multiethnic cohort in the southeastern USA. *Cancer Causes & Control* 25(8), pp.  
1021       1055–1062.
- 1022       78. Walboomers, J.M.M., Jacobs, M.V., Manos, M.M., Bosch, X.F., Kummer, A.J., Shah, K.V.,  
1023       Snijders, P.J., Peto, J., Meijer, C.J. and Muñoz, N. 1999. Human papillomavirus is a necessary  
1024       cause of invasive cervical cancer worldwide. *The Journal of Pathology* 189(1), pp. 12–19.
- 1025       79. Watson, M., Benard, V., King, J., Crawford, A. and Saraiya, M. 2017. National assessment of  
1026       HPV and Pap tests: Changes in cervical cancer screening, National Health Interview Survey.  
1027       *Preventive Medicine* 100, pp. 243–247.
- 1028       80. Wiesenfeld, H.C. and Manhart, L.E. 2017. *Mycoplasma genitalium* in Women: Current Knowledge  
1029       and Research Priorities for This Recently Emerged Pathogen. *The Journal of Infectious Diseases*  
1030       216(suppl\_2), pp. S389–S395.
- 1031       81. Wong, E.L.Y., Chan, P.K.S., Chor, J.S.Y., Cheung, A.W.L., Huang, F. and Wong, S.Y.S. 2016.  
1032       Evaluation of the Impact of Human Papillomavirus DNA Self-sampling on the Uptake of Cervical  
1033       Cancer Screening. *Cancer Nursing* 39(1), pp. E1–E11.
- 1034       82. Ziklo, N., Huston, W.M., Hocking, J.S. and Timms, P. 2016. *Chlamydia trachomatis* Genital Tract  
1035       Infections: When Host Immune Response and the Microbiome Collide. *Trends in Microbiology*  
1036       24(9), pp. 750–765.
- 1037
- 1038
